# Supplementary material for: Design and Practical Application of a Waveform Cryogenic Clamp: Innovation in Low-temperature Control and Tendon Biomechanics
Source: Research Square preprint supplement (doi:10.21203/rs.3.rs-6260002/v1), 2025-04-15
Supplement: Supplementary file 1 [file 5ea932ee26d6a113d28ddf89.xlsx]

## Sheet: Master Table
Test results of the waveform cryogenic clamp in biomechanics
Groups	Sample numbers	Cross-sectional area (mm2)	Initial length L1(cm)	Cyclic △L (mm)	Cyclic L50 (mm)	Cyclic creep (%)	Slip distance (cm)	Location and extent of fracture	Ultimate load (N)	Maximum stress (MPa)	Elastic modulus (MPa)	the upper clamp temperature (℃)		the lower clamp temperature (℃)
Waveform room-temperature clamp group	1	13.4147	6.1134	0.347	61.481	0.567606	0	Complete rupture at 8 cm from the tendon base (complete rupture at the lower clamp jaws)	965	71.9359	898.647	26±2
	2	16.1968	6.0135	0.569	60.704	0.946204	1.1 (Slip at the upper clamp jaws)	No rupture	813	50.195	601.078
	3	19.6261	5.9131	0.402	59.533	0.679846	2.3 (Slip at the lower clamp jaws)	No rupture	673	34.2911	545.323
	4	16.6035	5.7076	0.673	57.749	1.17913	0	Partial rupture at 3 cm from the tendon base (partial rupture at the upper clamp jaws)	847	51.0132	560.986
	5	19.4293	6.012	0.573	60.693	0.953094	0	Complete rupture at 9 cm from the tendon base (complete rupture at the lower clamp jaws)	949	48.8438	666.409
	6	16.6813	5.4066	0.416	54.482	0.76943	1.1 (Slip at the lower clamp jaws)	No rupture	732	43.8815	685.469
	7	14.9404	6.1042	0.381	61.423	0.62416	2 (Slip at the upper clamp jaws)	No rupture	686	45.9159	558.805
	8	12.7168	5.5049	0.395	55.444	0.717543	0	Partial rupture at 3 cm from the tendon base (partial rupture at the upper clamp jaws)	892	70.1433	1058.83
	9	15.7805	6.2035	0.477	62.512	0.768921	0	Complete rupture at 8 cm from the tendon base (complete rupture at the lower clamp jaws)	1107	70.1499	835.88
	10	10.9162	5.507	0.558	55.628	1.01326	0	Partial rupture at 3 cm from the tendon base (partial rupture at the upper clamp jaws)	813	74.4766	916.121
Waveform cryogenic clamp group	11	15.4913	6.159	0.126	61.716	0.204579	0	Complete rupture at 6 cm from the tendon base (Tendon midsection)	2316	149.503	1240.03	36	38	40	43
	12	11.8023	6.153	0.109	61.639	0.177149	0	Partial rupture at 5.5 cm from the tendon base (Tendon midsection)	1741	147.514	1521.56	38	37	38	39
	13	11.7183	5.837	0.078	58.448	0.13363	0	Complete rupture at 7.5 cm from the tendon base (Tendon midsection)	2172	185.352	1680.66	37	39	41	39
	14	13.2342	5.574	0.152	55.892	0.272695	0	Complete rupture at 7.5 cm from the tendon base (Tendon midsection)	1916	144.777	1055.83	35	38	39	40
	15	16.5607	6.068	0.109	60.789	0.179631	0	Complete rupture at 5 cm from the tendon base (Tendon midsection)	2036	122.941	1243.29	38	40	41	39
	16	16.3295	6.245	0.13	62.58	0.208167	0	Complete rupture at 8.5 cm from the tendon base (Tendon midsection)	2576	157.751	1386.16	35	38	38	39
	17	15.2486	6.238	0.092	62.472	0.147483	0	Complete rupture at 7.5 cm from the tendon base (Tendon midsection)	2334	153.063	1645.76	38	39	39	37
	18	17.7005	5.454	0.138	54.678	0.253025	0	Partial rupture at 3 cm from the tendon base (Tendon midsection)	1627	91.9185	891.079	40	38	40	41
	19	16.1524	6.263	0.115	62.745	0.183618	0	Complete rupture at 5 cm from the tendon base (Tendon midsection)	2088	129.269	1489.08	38	40	37	39
	20	15.8013	5.687	0.072	56.942	0.126605	0	Complete rupture at 7.5 cm from the tendon base (Tendon midsection)	1953	123.598	1538.14

## Sheet: SPSS Analysis - Master Table
Test results of the waveform cryogenic clamp in biomechanics
Groups	Sample numbers	Cross-sectional area (mm2)				Initial length L1(cm)	Cyclic △L (mm)	Cyclic L50 (mm)	Cyclic creep (%)				Slip distance (cm)	Location and extent of fracture	Ultimate load (N)				Maximum stress (MPa)				Elastic modulus (MPa)				the upper clamp temperature (℃)		the lower clamp temperature (℃)
		Cross-sectional area (mm2)	Average (mm2)	`X±SD (mm2)	Statistical analysis				Cyclic creep (%)	Average (%)	`X±SD (%)	Statistical analysis			Ultimate load (N)	Average (%)	`X±SD (%)	Statistical analysis	Maximum stress (MPa)	Average (MPa)	`X±SD (MPa)	Statistical analysis	Elastic modulus (MPa)	Average (MPa)	`X±SD (MPa)	Statistical analysis
波形常温夹具组	1	13.4147	15.6306	15.631±2.767	Normality Test (Shapiro-Wilk Test): All groups have P≥0.05, indicating a normal distribution; Homogeneity of Variance (Levene's Test): F=0.532, P=0.475>0.05, showing homogeneity of variance; Independent Samples t-Test: t=0.575, P=0.572>0.05, suggesting no significant difference between groups.	6.1134	0.347	61.481	0.567606	0.821919	0.822±0.194	Normality Test (Shapiro-Wilk Test): All groups have P≥0.05, indicating a normal distribution; Homogeneity of Variance (Levene Test): F=16.119, P=0.001***, indicating non-homogeneity of variance; Non-parametric Test (Mann-Whitney U Test): Z=-3.781, P<0.001***, suggesting a significant difference between groups.	0	Complete rupture at 8 cm from the tendon base (complete rupture at the lower clamp jaws)	965	847.7	847.7±135.68	Normality Test (Shapiro-Wilk Test): All groups have P≥0.05, indicating a normal distribution; Homogeneity of Variance (Levene Test): F=4.009, P=0.061>0.05, showing homogeneity of variance; Independent Samples t-Test: t=-12.246, P<0.001***, suggesting an extremely significant difference between groups.	71.9359	56.0846	56.085±14.24	Normality Test (Shapiro-Wilk Test): All groups have P≥0.05, indicating a normal distribution; Homogeneity of Variance (Levene Test): F=0.755, P=0.396>0.05, showing homogeneity of variance; Independent Samples t-Test: t=-10.683, P<0.001***, suggesting an extremely significant difference between groups.	898.647	732.755	732.755±181.651	Normality Test (Shapiro-Wilk Test): All groups have P≥0.05, indicating a normal distribution; Homogeneity of Variance (Levene Test): F=1.198, P=0.288>0.05, showing homogeneity of variance; Independent Samples t-Test: t=-6.377, P<0.001***, suggesting an extremely significant difference between groups.	26±2
	2	16.1968				6.0135	0.569	60.704	0.946204				1.1 (Slip at the upper clamp jaws)	No rupture	813				50.195				601.078
	3	19.6261				5.9131	0.402	59.533	0.679846				2.3 (Slip at the lower clamp jaws)	No rupture	673				34.2911				545.323
	4	16.6035				5.7076	0.673	57.749	1.17913				0	Partial rupture at 3 cm from the tendon base (partial rupture at the upper clamp jaws)	847				51.0132				560.986
	5	19.4293				6.012	0.573	60.693	0.953094				0	Complete rupture at 9 cm from the tendon base (complete rupture at the lower clamp jaws)	949				48.8438				666.409
	6	16.6813				5.4066	0.416	54.482	0.76943				1.1 (Slip at the lower clamp jaws)	No rupture	732				43.8815				685.469
	7	14.9404				6.1042	0.381	61.423	0.62416				2 (Slip at the upper clamp jaws)	No rupture	686				45.9159				558.805
	8	12.7168				5.5049	0.395	55.444	0.717543				0	Partial rupture at 3 cm from the tendon base (partial rupture at the upper clamp jaws)	892				70.1433				1058.83
	9	15.7805				6.2035	0.477	62.512	0.768921				0	Complete rupture at 8 cm from the tendon base (complete rupture at the lower clamp jaws)	1107				70.1499				835.88
	10	10.9162				5.507	0.558	55.628	1.01326				0	Partial rupture at 3 cm from the tendon base (partial rupture at the upper clamp jaws)	813				74.4766				916.121
波形冷冻夹具组	11	15.4913	15.0039	15.004±2.052		6.159	0.126	61.716	0.204579	0.188658	0.189±0.048		0	Complete rupture at 6 cm from the tendon base (Tendon midsection)	2316	2075.9	2075.9±286.682		149.503	140.569	140.569±25.157		1240.03	1369.16	1369.158±258.036		36	38	40	43
	12	11.8023				6.153	0.109	61.639	0.177149				0	Partial rupture at 5.5 cm from the tendon base (Tendon midsection)	1741				147.514				1521.56				38	37	38	39
	13	11.7183				5.837	0.078	58.448	0.13363				0	Complete rupture at 7.5 cm from the tendon base (Tendon midsection)	2172				185.352				1680.66				37	39	41	39
	14	13.2342				5.574	0.152	55.892	0.272695				0	Complete rupture at 7.5 cm from the tendon base (Tendon midsection)	1916				144.777				1055.83				35	38	39	40
	15	16.5607				6.068	0.109	60.789	0.179631				0	Complete rupture at 5 cm from the tendon base (Tendon midsection)	2036				122.941				1243.29				38	40	41	39
	16	16.3295				6.245	0.13	62.58	0.208167				0	Complete rupture at 8.5 cm from the tendon base (Tendon midsection)	2576				157.751				1386.16				35	38	38	39
	17	15.2486				6.238	0.092	62.472	0.147483				0	Complete rupture at 7.5 cm from the tendon base (Tendon midsection)	2334				153.063				1645.76				38	39	39	37
	18	17.7005				5.454	0.138	54.678	0.253025				0	Partial rupture at 3 cm from the tendon base (Tendon midsection)	1627				91.9185				891.079				40	38	40	41
	19	16.1524				6.263	0.115	62.745	0.183618				0	Complete rupture at 5 cm from the tendon base (Tendon midsection)	2088				129.269				1489.08				38	40	37	39
	20	15.8013				5.687	0.072	56.942	0.126605				0	Complete rupture at 7.5 cm from the tendon base (Tendon midsection)	1953				123.598				1538.14

## Sheet: Cross-sectional area
Measurement results of cross-sectional area of animal tendons before gripping by waveform room-temperature clamp group and waveform cryogenic clamp group
Groups	Sample numbers	Cross-sectional area per 1 cm cutting plane (mm2)	Cross-sectional area (mm2)	Average(mm2)	`X±SD(mm2)
Waveform room-temperature clamp group	1	10.756	13.4147	15.6306	15.631±2.767
		13.39
		18.742
		17.076
		14.39
		14.858
		12.411
		11.86
		12.234
		11.162
		10.683
	2	13.005	16.1968
		19.388
		24.125
		19.825
		13.765
		15.317
		15.431
		15.285
		14.91
		13.88
		13.234
	3	18.665	19.6261
		22.928
		26.797
		27.33
		17.521
		16.534
		18.01
		17.871
		16.761
		16.447
		17.023
	4	12.738	16.6035
		15.155
		16.349
		17.254
		17.413
		17.581
		18.738
		19.083
		15.817
		14.632
		17.879
	5	17.465	19.4293
		20.792
		27.813
		29.585
		21.517
		19.802
		18.341
		16.635
		14.251
		13.93
		13.591
	6	13.943	16.6813
		13.783
		16.057
		18.831
		17.46
		16.514
		18.14
		16.886
		15.77
		16.716
		19.394
	7	11.296	14.9404
		16.254
		23.275
		21.246
		13.845
		13.303
		13.639
		13.487
		13.411
		12.858
		11.73
	8	9.172	12.7168
		10.109
		10.911
		12.587
		12.837
		14.097
		14.472
		14.649
		13.961
		13.191
		13.899
	9	11.633	15.7805
		18.114
		25.555
		21.937
		14.642
		13.905
		13.15
		13.468
		13.125
		12.276
	10	8.247	10.9162
		8.667
		9.147
		8.453
		9.044
		9.121
		8.41
		14.891
		16.065
		14.342
		13.691
Waveform cryogenic clamp group	11	14.351	15.4913	15.0039	15.004±2.052
		22.308
		20.508
		17.967
		14.726
		14.717
		12.464
		12.674
		12.743
		12.455
	12	8.522	11.8023
		10.391
		11.896
		17.476
		16.879
		14.102
		11.091
		11.931
		9.231
		9.326
		8.98
	13	10.109	11.7183
		13.004
		16.576
		16.978
		10.448
		11.317
		10.886
		10.166
		10.709
		9.7
		9.008
	14	11.377	13.2342
		11.728
		12.234
		13.563
		13.357
		14.206
		14.035
		13.855
		12.972
		14.523
		13.726
	15	16.23	16.5607
		22.378
		24.643
		19.85
		16.106
		16.172
		14.966
		12.454
		11.974
		13.206
		14.189
	16	16.182	16.3295
		23.896
		25.916
		18.81
		15.214
		15.771
		13.587
		13.168
		10.985
		12.432
		13.664
	17	12.481	15.2486
		13.984
		15.058
		15.46
		16.255
		18.709
		18.901
		16.7
		13.032
		12.988
		14.167
	18	13.12	17.7005
		13.963
		13.863
		16.584
		19.449
		20.083
		21.063
		18.977
		16.901
		19.757
		20.945
	19	12.801	16.1524
		22.61
		26.13
		17.858
		16.495
		15.114
		13.974
		12.842
		12.164
		11.536
	20	9.693	15.8013
		11.669
		11.007
		12.213
		13.61
		16.946
		14.462
		17.735
		23.991
		23.257
		19.231
