# Supplementary material for: Design and Practical Application of a Waveform Cryogenic Clamp: Innovation in Low-temperature Control and Tendon Biomechanics
Source: Research Square preprint supplement (doi:10.21203/rs.3.rs-6260002/v1), 2025-04-15
Supplement: Supplementary file 2 [file f3fd81558492171f2ade8820.xlsx]

## Sheet: 1Quenching method-upper clamp
Quenching method-the upper clamp
Time (minutes)	Temperature of the fixed jaw plate (°C)			Average temperature of the fixed jaw plate (°C)	Temperature of the clamp jaws (°C)			Average temperature of the clamp jaws (°C)	Temperature of the movable jaw plate (°C)			Average temperature of the movable jaw plate (°C)	Temperature of the tendon at 1cm proximity to the clamp jaws (°C)			Average temperature of the tendon at 1cm proximity to the clamp jaws (°C)	Temperature of the tendon at 2cm proximity to the clamp jaws (°C)			Average temperature of the tendon at 2cm proximity to the clamp jaws (°C)
0	24.5	23.8	23.4	23.9	23.6	24.1	24.5	24.0667	23.8	24.4	24.7	24.3	26.1	25.5	26.5	26.0333	26.7	25.9	25.9	26.1667
0.5	10.2	14.3	13.9	12.8	12.3	14.8	15.6	14.2333	14.1	15.6	13.7	14.4667	11.6	10.1	13.2	11.6333	15.8	14.2	17.7	15.9
1	-21.7	-18	-19.2	-19.6333	-16.8	-9.5	-12.5	-12.9333	-14.1	-11.1	-18.1	-14.4333	-13.1	-17.1	-10.6	-13.6	-10.9	-8	-6.3	-8.4
1.5	-177.4	-168.5	-178.7	-174.867	-27.2	-28.4	-23.2	-26.2667	-19.5	-18.8	-25.5	-21.2667	-139.8	-142.5	-132.5	-138.267	-86.2	-91.5	-79.5	-85.7333
2	-53.7	-46.7	-50.2	-50.2	-47.7	-44.9	-45.3	-45.9667	-41.2	-36.4	-48.2	-41.9333	-48.4	-51.2	-41.2	-46.9333	-43.3	-45.4	-40.9	-43.2
2.5	-51.9	-47.4	-49	-49.4333	-44.4	-43.8	-43.3	-43.8333	-40.1	-37.7	-45.1	-40.9667	-45.7	-49.4	-40.1	-45.0667	-40.3	-42.1	-38.9	-40.4333
3	-50.2	-46.6	-46.1	-47.6333	-45.2	-42.5	-43.7	-43.8	-38.5	-35.5	-43.6	-39.2	-42.5	-46.6	-38.6	-42.5667	-36.7	-38.3	-37.1	-37.3667
3.5	-48.6	-44.8	-46.9	-46.7667	-43.4	-42.6	-42.5	-42.8333	-38.2	-34.6	-41.5	-38.1	-39.6	-44.5	-37.5	-40.5333	-34.5	-35.6	-33.4	-34.5
4	-47.4	-43.5	-45.6	-45.5	-43.8	-41.3	-41	-42.0333	-36.4	-32.3	-39.2	-35.9667	-37.3	-41.2	-38.2	-38.9	-31.4	-33.8	-30	-31.7333
4.5	-45.8	-41.7	-44.3	-43.9333	-42.5	-40.8	-40.3	-41.2	-35.8	-30.7	-38.8	-35.1	-35.1	-39.4	-35.4	-36.6333	-28.3	-30.3	-30.4	-29.6667
5	-45.2	-41.3	-42.3	-42.9333	-42.3	-39.5	-40.6	-40.8	-33.2	-30.3	-37.6	-33.7	-33.3	-36.8	-34.8	-34.9667	-26.6	-29.7	-27.6	-27.9667
5.5	-43.9	-40.6	-41.4	-41.9667	-41.8	-38.2	-39.4	-39.8	-31.6	-29.5	-36.4	-32.5	-32.5	-35.6	-31.6	-33.2333	-24.4	-27.1	-25.5	-25.6667
6	-41.5	-38.9	-40.5	-40.3	-39.2	-37.7	-38.7	-38.5333	-29.4	-28.2	-35.6	-31.0667	-30	-33.6	-29.6	-31.0667	-21.7	-24.2	-24.3	-23.4
6.5	-40.3	-38.6	-40.1	-39.6667	-38.7	-37.9	-37.3	-37.9667	-28.7	-26.4	-35	-30.0333	-28.4	-31.3	-27	-28.9	-20.3	-23.5	-22.3	-22.0333
7	-39.7	-37.7	-39.6	-39	-37.4	-36.6	-36.8	-36.9333	-29.1	-25.8	-33.2	-29.3667	-27.8	-29.1	-26.1	-27.6667	-18.5	-21.7	-20.6	-20.2667
7.5	-38.2	-36.3	-38.6	-37.7	-35.3	-35.3	-36.5	-35.7	-27.5	-25.9	-30.1	-27.8333	-25.9	-28.3	-24.6	-26.2667	-16.2	-19.5	-18	-17.9
8	-36.9	-34.1	-37.4	-36.1333	-34.1	-35.5	-34.2	-34.6	-27.4	-24.1	-30.5	-27.3333	-24.1	-26.4	-22.9	-24.4667	-15.6	-19.2	-17.5	-17.4333
8.5	-35.3	-33.5	-38.2	-35.6667	-33.5	-34.8	-33.5	-33.9333	-26	-22.5	-29.9	-26.1333	-23.6	-25	-21.4	-23.3333	-13.8	-18.7	-16.8	-16.4333
9	-34.8	-32.2	-35.8	-34.2667	-32.2	-33.4	-32.1	-32.5667	-24.8	-21.3	-28.4	-24.8333	-21.3	-23.8	-19.8	-21.6333	-12.5	-16.8	-15.2	-14.8333
9.5	-34.1	-31.8	-35.5	-33.8	-32.8	-33.6	-31.2	-32.5333	-23.6	-20.6	-27.2	-23.8	-20.2	-21.2	-18.2	-19.8667	-11.7	-16.4	-13.9	-14
10	-33.6	-30.6	-34	-32.7333	-31.6	-32.7	-30.6	-31.6333	-22.4	-20.4	-27.8	-23.5333	-19.6	-20.6	-17.8	-19.3333	-10.4	-15.5	-11.3	-12.4
10.5	-31.3	-29.5	-33.3	-31.3667	-30.5	-31.1	-29.9	-30.5	-22.1	-19.7	-26.4	-22.7333	-18.7	-19.4	-17.4	-18.5	-8.5	-13.9	-9.2	-10.5333
11	-30.7	-28.2	-32.9	-30.6	-29.2	-30.5	-28.4	-29.3667	-20.7	-18.8	-25.6	-21.7	-17.8	-18.8	-16.6	-17.7333	-8.1	-12.1	-8.4	-9.53333
11.5	-29.5	-28.4	-30.5	-29.4667	-28.4	-29.2	-27	-28.2	-19.8	-17.3	-25.3	-20.8	-16.3	-17.2	-15.3	-16.2667	-7.2	-11.9	-7.8	-8.96667
12	-29.2	-26.8	-29.3	-28.4333	-27.8	-30.3	-26.5	-28.2	-19.5	-17.7	-24.5	-20.5667	-15.7	-16.8	-14.5	-15.6667	-6.6	-11.3	-6.1	-8
12.5	-28.8	-25.6	-29.2	-27.8667	-27.6	-28.3	-26.4	-27.4333	-17.4	-16.2	-22.7	-18.7667	-14.2	-16.4	-13.7	-14.7667	-5.8	-10.5	-5.2	-7.16667
13	-27.4	-24.6	-28.9	-26.9667	-26.6	-27.6	-25.2	-26.4667	-17.6	-14.6	-22.2	-18.1333	-13.6	-15.6	-13.2	-14.1333	-5.3	-9.4	-4.7	-6.46667
13.5	-26.6	-24	-27.4	-26	-24	-27.5	-24.6	-25.3667	-16.3	-13.3	-21.8	-17.1333	-12.9	-14.8	-12.8	-13.5	-4.9	-8.7	-4.4	-6
14	-26.3	-23.1	-26.8	-25.4	-23.1	-26.6	-23.3	-24.3333	-15.8	-12.9	-20.1	-16.2667	-12.3	-14.5	-11.1	-12.6333	-4.3	-8.5	-3.8	-5.53333
14.5	-24.5	-21.6	-25.4	-23.8333	-21.6	-26.8	-22.5	-23.6333	-14.4	-11.7	-19.8	-15.3	-11.4	-13.5	-10.3	-11.7333	-4.2	-7.3	-2.9	-4.8
15	-23.7	-21.3	-25.3	-23.4333	-20.3	-25.1	-21.9	-22.4333	-14.2	-11.4	-19.3	-14.9667	-11.2	-12.9	-9.8	-11.3	-3.7	-6.1	-2.1	-3.96667
15.5	-22.9	-20.7	-24.5	-22.7	-19.7	-24.2	-21.5	-21.8	-13.8	-10.8	-18.5	-14.3667	-10.8	-12.6	-9.2	-10.8667	-3.5	-5.5	-1.2	-3.4
16	-22.4	-19.5	-23	-21.6333	-19.5	-23.6	-20.2	-21.1	-13.1	-9.7	-17.7	-13.5	-9.7	-12.4	-8.6	-10.2333	-3.1	-5.2	-0.2	-2.83333
16.5	-21.1	-18.2	-22.7	-20.6667	-18.2	-22.8	-19.1	-20.0333	-12.8	-9.5	-17.4	-13.2333	-9.6	-11.3	-8.3	-9.73333	-2.8	-4.7	0.4	-2.36667
17	-19.3	-18.8	-21.1	-19.7333	-17.8	-20.2	-17.8	-18.6	-11.3	-9.3	-16.7	-12.4333	-9.6	-10.8	-8.1	-9.5	-2.4	-4.3	1.4	-1.76667
17.5	-19.8	-16.4	-19.5	-18.5667	-16.4	-19.9	-16.7	-17.6667	-10.6	-8.9	-15.5	-11.6667	-8.7	-10.5	-7.8	-9	-2.1	-3.8	1.7	-1.4
18	-18.5	-15.6	-18.6	-17.5667	-16.6	-18.7	-15.5	-16.9333	-10.4	-8.3	-15.2	-11.3	-8.3	-9.7	-7.5	-8.5	-1.6	-3.5	2.5	-0.866667
18.5	-17.4	-15.3	-17.7	-16.8	-15.3	-17.4	-14.9	-15.8667	-9.7	-7.7	-14.8	-10.7333	-7.9	-9.3	-7.2	-8.13333	-1.2	-2.9	2.6	-0.5
19	-16.6	-14.5	-15.2	-15.4333	-14.5	-16.1	-14.7	-15.1	-9.5	-7.2	-13.6	-10.1	-7.4	-8.5	-6.7	-7.53333	0.4	-2.4	2.8	0.266667
19.5	-16.2	-13.7	-15.9	-15.2667	-12.7	-16.6	-13.4	-14.2333	-9.4	-7.4	-12.3	-9.7	-7.2	-8.2	-6.3	-7.23333	1	-2.3	3.3	0.666667
20	-15.7	-12.9	-14.4	-14.3333	-12.9	-15.4	-12.8	-13.7	-8.8	-6.8	-11.9	-9.16667	-6.8	-7.8	-5.9	-6.83333	1.6	-1.6	3.8	1.26667
20.5	-14.5	-11.4	-13	-12.9667	-11.4	-14.9	-11.2	-12.5	-8.6	-6.2	-11.5	-8.76667	-6.5	-7.3	-5.5	-6.43333	2.3	-1.4	4	1.63333
21	-14.7	-11.1	-12.8	-12.8667	-10.1	-12.1	-10.6	-10.9333	-7.9	-5.5	-10.8	-8.06667	-6.2	-6.6	-4.8	-5.86667	3.1	-0.5	4.5	2.36667
21.5	-13.4	-10.3	-12.5	-12.0667	-10.3	-12.2	-10.3	-10.9333	-7.4	-5.1	-9.6	-7.36667	-5.9	-5.9	-4.6	-5.46667	3.9	0.7	4.9	3.16667
22	-12.9	-9.8	-11.9	-11.5333	-9.8	-11.9	-9.5	-10.4	-6.5	-4.9	-9.2	-6.86667	-5.8	-5.6	-3.7	-5.03333	4.4	1.7	5.1	3.73333
22.5	-11.5	-9.5	-10.3	-10.4333	-9.5	-10.3	-8.9	-9.56667	-5.8	-4.5	-8.9	-6.4	-5.4	-4.8	-3.5	-4.56667	5.1	1.8	5.6	4.16667
23	-11.2	-9.4	-10.8	-10.4667	-8.6	-10.9	-8.5	-9.33333	-5.5	-4.4	-8.7	-6.2	-4.7	-4.7	-3.2	-4.2	5.7	2.7	6.2	4.86667
23.5	-9.4	-8.6	-9.3	-9.1	-8.2	-9.2	-7.5	-8.3	-4.8	-3.7	-8.4	-5.63333	-4.5	-4.1	-2.8	-3.8	6.1	2.9	6.8	5.26667
24	-8.7	-7.7	-9.1	-8.5	-7.7	-9.6	-7.3	-8.2	-4.6	-3.2	-7.5	-5.1	-4.6	-3.9	-2.6	-3.7	6.8	3.1	7.4	5.76667
24.5	-8.9	-7.3	-8.2	-8.13333	-6.7	-8.8	-6.7	-7.4	-4.3	-3.2	-7.2	-4.9	-4.2	-3.7	-2.2	-3.36667	7.5	4	8.3	6.6
25	-7.3	-6.8	-7.4	-7.16667	-6.5	-8.4	-5.5	-6.8	-3.9	-2.8	-6.7	-4.46667	-3.8	-3.4	-1.4	-2.86667	8	4.2	8.7	6.96667
25.5	-6.1	-6.5	-7.2	-6.6	-5.8	-7.6	-4.7	-6.03333	-3.7	-2.5	-6.3	-4.16667	-3.7	-2.9	-0.7	-2.43333	8.3	4.7	9.4	7.46667
26	-5.5	-5.6	-6.1	-5.73333	-5.6	-7.2	-4.5	-5.76667	-3.5	-1.8	-5.9	-3.73333	-3.5	-2.6	0.9	-1.73333	9	5.4	9.6	8
26.5	-5	-5.3	-5.5	-5.26667	-4.3	-6	-4.3	-4.86667	-3.2	-1.2	-5.3	-3.23333	-3.2	-2.5	1.3	-1.46667	9.6	6.3	10.5	8.8
27	-4.4	-4.9	-5.1	-4.8	-3.9	-5.7	-3.7	-4.43333	-2.7	-0.9	-4.7	-2.76667	-3	-1.7	1.5	-1.06667	9.8	6.5	10.8	9.03333
27.5	-3.6	-4.5	-4.4	-4.16667	-2.8	-5.5	-3.4	-3.9	-2.4	0.2	-4.5	-2.23333	-2.8	-1.4	2.2	-0.666667	10.1	7.2	11.5	9.6
28	-4.1	-3.8	-3.8	-3.9	-2.6	-4.5	-2.7	-3.26667	-1.6	0.5	-3.4	-1.5	-2.5	-0.9	2.5	-0.3	10.6	7.6	11.7	9.96667
28.5	-2.7	-2.6	-3.1	-2.8	-2.5	-4.2	-2.6	-3.1	-1.2	1.1	-3	-1.03333	-2.3	0.3	3.4	0.466667	11	7.7	12.2	10.3
29	-2.5	-2.2	-3.3	-2.66667	-1.2	-3.3	-2.2	-2.23333	0.1	1.6	-2.9	-0.4	-2.2	1.1	3.9	0.933333	11.2	8.5	12.5	10.7333
29.5	-2.1	-1.7	-2.9	-2.23333	-0.7	-2.8	-1.5	-1.66667	0.5	2.3	-2.4	0.133333	-2	1.5	4	1.16667	11.5	8.8	12.6	10.9667
30	-2.3	-1.4	-2.1	-1.93333	0.4	-2.7	-1.2	-1.16667	1	2.5	-1.7	0.6	-1.9	1.9	4.2	1.4	12	8.9	13.3	11.4
30.5	-1.9	-0.9	-1.6	-1.46667	0.9	-2.2	-0.5	-0.6	1.4	2.8	-1.2	1	-1.4	2.4	4.7	1.9	12.5	9.3	13.5	11.7667
31	-1.4	-0.5	-1.3	-1.06667	1.5	-1.4	0.4	0.166667	1.9	3.2	-0.1	1.66667	0.2	2.7	4.8	2.56667	12.6	9.8	14.4	12.2667
31.5	-0.8	0.2	-1.1	-0.566667	1.2	-1.2	0.9	0.3	2	3.6	0.5	2.03333	0.5	3.2	5.2	2.96667	12.9	10.1	14.7	12.5667
32	-0.3	0.4	-0.3	-0.0666667	2.4	-0.4	1.4	1.13333	2.7	3.8	0.9	2.46667	1.2	3.9	5.5	3.53333	13.1	10.4	15.1	12.8667
32.5	0.6	0.7	0.5	0.6	2.7	0.5	1.8	1.66667	2.8	4	1.3	2.7	1.5	4.2	5.7	3.8	13.3	11.3	15.6	13.4
33	1.2	0.9	0.8	0.966667	2.9	0.8	2.1	1.93333	3.3	4.2	1.6	3.03333	2.5	4.5	6.3	4.43333	13.7	11.5	15.8	13.6667
33.5	1.3	1	1.4	1.23333	3.1	1.3	2.4	2.26667	3.6	4.5	1.7	3.26667	3.9	4.9	6.7	5.16667	14.1	11.6	16.3	14
34	1.5	1.1	1.7	1.43333	3.3	1.8	2.6	2.56667	3.7	4.7	2	3.46667	4.7	5.3	7.4	5.8	14.4	12.5	16.6	14.5
34.5	2.1	1.5	2.2	1.93333	3.5	2.2	3.2	2.96667	4.2	5.2	2.2	3.86667	5.6	5.6	7.5	6.23333	14.9	12.7	16.7	14.7667
35	2.5	1.8	2.6	2.3	3.8	2.7	3.5	3.33333	4.6	5.7	2.6	4.3	6.5	5.7	7.8	6.66667	15.3	12.9	17.4	15.2

## Sheet: 1Quenching method (average)
Quenching method-the upper clamp (average)
Time (minutes)	Average temperature of the fixed jaw plate (°C)	Average temperature of the clamp jaws (°C)	Average temperature of movable jaw plate (°C)	Average temperature of the tendon at 1cm proximity to the clamp jaws (°C)	Average temperature of the tendon at 2cm proximity to the clamp jaws (°C)
0	23.9	24.0667	24.3	26.0333	26.1667
0.5	12.8	14.2333	14.4667	11.6333	15.9
1	-19.6333	-12.9333	-14.4333	-13.6	-8.4
1.5	-174.867	-26.2667	-21.2667	-138.267	-85.7333
2	-50.2	-45.9667	-41.9333	-46.9333	-43.2
2.5	-49.4333	-43.8333	-40.9667	-45.0667	-40.4333
3	-47.6333	-43.8	-39.2	-42.5667	-37.3667
3.5	-46.7667	-42.8333	-38.1	-40.5333	-34.5
4	-45.5	-42.0333	-35.9667	-38.9	-31.7333
4.5	-43.9333	-41.2	-35.1	-36.6333	-29.6667
5	-42.9333	-40.8	-33.7	-34.9667	-27.9667
5.5	-41.9667	-39.8	-32.5	-33.2333	-25.6667
6	-40.3	-38.5333	-31.0667	-31.0667	-23.4
6.5	-39.6667	-37.9667	-30.0333	-28.9	-22.0333
7	-39	-36.9333	-29.3667	-27.6667	-20.2667
7.5	-37.7	-35.7	-27.8333	-26.2667	-17.9
8	-36.1333	-34.6	-27.3333	-24.4667	-17.4333
8.5	-35.6667	-33.9333	-26.1333	-23.3333	-16.4333
9	-34.2667	-32.5667	-24.8333	-21.6333	-14.8333
9.5	-33.8	-32.5333	-23.8	-19.8667	-14
10	-32.7333	-31.6333	-23.5333	-19.3333	-12.4
10.5	-31.3667	-30.5	-22.7333	-18.5	-10.5333
11	-30.6	-29.3667	-21.7	-17.7333	-9.53333
11.5	-29.4667	-28.2	-20.8	-16.2667	-8.96667
12	-28.4333	-28.2	-20.5667	-15.6667	-8
12.5	-27.8667	-27.4333	-18.7667	-14.7667	-7.16667
13	-26.9667	-26.4667	-18.1333	-14.1333	-6.46667
13.5	-26	-25.3667	-17.1333	-13.5	-6
14	-25.4	-24.3333	-16.2667	-12.6333	-5.53333
14.5	-23.8333	-23.6333	-15.3	-11.7333	-4.8
15	-23.4333	-22.4333	-14.9667	-11.3	-3.96667
15.5	-22.7	-21.8	-14.3667	-10.8667	-3.4
16	-21.6333	-21.1	-13.5	-10.2333	-2.83333
16.5	-20.6667	-20.0333	-13.2333	-9.73333	-2.36667
17	-19.7333	-18.6	-12.4333	-9.5	-1.76667
17.5	-18.5667	-17.6667	-11.6667	-9	-1.4
18	-17.5667	-16.9333	-11.3	-8.5	-0.866667
18.5	-16.8	-15.8667	-10.7333	-8.13333	-0.5
19	-15.4333	-15.1	-10.1	-7.53333	0.266667
19.5	-15.2667	-14.2333	-9.7	-7.23333	0.666667
20	-14.3333	-13.7	-9.16667	-6.83333	1.26667
20.5	-12.9667	-12.5	-8.76667	-6.43333	1.63333
21	-12.8667	-10.9333	-8.06667	-5.86667	2.36667
21.5	-12.0667	-10.9333	-7.36667	-5.46667	3.16667
22	-11.5333	-10.4	-6.86667	-5.03333	3.73333
22.5	-10.4333	-9.56667	-6.4	-4.56667	4.16667
23	-10.4667	-9.33333	-6.2	-4.2	4.86667
23.5	-9.1	-8.3	-5.63333	-3.8	5.26667
24	-8.5	-8.2	-5.1	-3.7	5.76667
24.5	-8.13333	-7.4	-4.9	-3.36667	6.6
25	-7.16667	-6.8	-4.46667	-2.86667	6.96667
25.5	-6.6	-6.03333	-4.16667	-2.43333	7.46667
26	-5.73333	-5.76667	-3.73333	-1.73333	8
26.5	-5.26667	-4.86667	-3.23333	-1.46667	8.8
27	-4.8	-4.43333	-2.76667	-1.06667	9.03333
27.5	-4.16667	-3.9	-2.23333	-0.666667	9.6
28	-3.9	-3.26667	-1.5	-0.3	9.96667
28.5	-2.8	-3.1	-1.03333	0.466667	10.3
29	-2.66667	-2.23333	-0.4	0.933333	10.7333
29.5	-2.23333	-1.66667	0.133333	1.16667	10.9667
30	-1.93333	-1.16667	0.6	1.4	11.4
30.5	-1.46667	-0.6	1	1.9	11.7667
31	-1.06667	0.166667	1.66667	2.56667	12.2667
31.5	-0.566667	0.3	2.03333	2.96667	12.5667
32	-0.0666667	1.13333	2.46667	3.53333	12.8667
32.5	0.6	1.66667	2.7	3.8	13.4
33	0.966667	1.93333	3.03333	4.43333	13.6667
33.5	1.23333	2.26667	3.26667	5.16667	14
34	1.43333	2.56667	3.46667	5.8	14.5
34.5	1.93333	2.96667	3.86667	6.23333	14.7667
35	2.3	3.33333	4.3	6.66667	15.2

## Sheet: 2Quenching method-lower clamp
Quenching method-the lower clamp
Time (minutes)	Temperature of the fixed jaw plate (°C)			Average temperature of the fixed jaw plate (°C)	Temperature of the clamp jaws (°C)			Average temperature of the clamp jaws (°C)	Temperature of the movable jaw plate (°C)			Average temperature of the movable jaw plate (°C)	Temperature of the tendon at 1cm proximity to the clamp jaws (°C)			Average temperature of the tendon at 1cm proximity to the clamp jaws (°C)	Temperature of the tendon at 2cm proximity to the clamp jaws (°C)			Average temperature of the tendon at 2cm proximity to the clamp jaws (°C)
0	24.3	23.6	24.1	24	24.1	23.8	24.7	24.2	24.4	23.7	24.6	24.2333	26.7	25.5	26.3	26.1667	26.9	26.5	25.8	26.4
0.5	14.6	12.3	15.3	14.0667	13.1	16.6	15.8	15.1667	16.8	15.3	14.6	15.5667	12.3	10.6	14.7	12.5333	14.4	13.2	16.5	14.7
1	-17.8	-19.6	-16.8	-18.0667	-13.5	-10.5	-17.6	-13.8667	-13.5	-16.1	-18.5	-16.0333	-11.8	-14.1	-10.5	-12.1333	-9.5	-8.2	-10.1	-9.26667
1.5	-173.4	-178.3	-167.2	-172.967	-24.4	-21.2	-26.4	-24	-19.2	-22.8	-25.2	-22.4	-135.5	-140.6	-131.2	-135.767	-75.2	-78.2	-68.6	-74
2	-49.8	-53.9	-45.7	-49.8	-42.9	-39.3	-47.9	-43.3667	-39.3	-45.4	-45.3	-43.3333	-43.4	-51.8	-41.3	-45.5	-40.3	-43.3	-40.8	-41.4667
2.5	-48.7	-51.3	-46.4	-48.8	-43.8	-40.3	-45.1	-43.0667	-40.3	-44.7	-44.3	-43.1	-42.1	-47.4	-42.3	-43.9333	-39.6	-41.3	-38.4	-39.7667
3	-46.5	-50.6	-44.2	-47.1	-41.5	-38.7	-43.5	-41.2333	-38.7	-42.5	-43.7	-41.6333	-40.3	-46.8	-40.7	-42.6	-36.7	-40.7	-36.8	-38.0667
3.5	-47.3	-49.8	-43.4	-46.8333	-41.6	-38.5	-42.6	-40.9	-37.5	-41.6	-42.5	-40.5333	-38.6	-43.5	-39.5	-40.5333	-35.5	-38	-34.5	-36
4	-45.8	-47.5	-41.8	-45.0333	-40.3	-37	-40.8	-39.3667	-35.4	-40.3	-41	-38.9	-37.8	-41.5	-37	-38.7667	-33.2	-35.5	-33.5	-34.0667
4.5	-44.3	-47.9	-40.5	-44.2333	-39.8	-36.3	-40.3	-38.8	-33.3	-38.1	-39.3	-36.9	-35.3	-38.3	-35.6	-36.4	-31.3	-34.3	-31	-32.2
5	-42.7	-46.3	-39.3	-42.7667	-38.5	-35.6	-38.5	-37.5333	-32.6	-37.3	-38.6	-36.1667	-34.7	-37	-33.3	-35	-30.6	-32.6	-30.3	-31.1667
5.5	-41.6	-45.6	-39.8	-42.3333	-37.2	-34.4	-39.2	-36.9333	-31.4	-37.5	-37.4	-35.4333	-31.1	-36.4	-32.4	-33.3	-28.4	-31.4	-28.4	-29.4
6	-40.4	-45.9	-38.2	-41.5	-36.7	-32.7	-38.9	-36.1	-30.7	-36.2	-36.7	-34.5333	-30.2	-34.8	-30.7	-31.9	-27.7	-30.7	-27.8	-28.7333
6.5	-40.8	-43.6	-37.7	-40.7	-35.9	-32.3	-36.9	-35.0333	-29.3	-35.4	-34.3	-33	-28.5	-34.6	-29.3	-30.8	-25.3	-28.3	-25.9	-26.5
7	-39.5	-42.7	-37.4	-39.8667	-34.6	-31.5	-35.6	-33.9	-27.5	-34.8	-34.5	-32.2667	-27.7	-32.9	-27.5	-29.3667	-24.5	-27.5	-24.9	-25.6333
7.5	-38.3	-41.3	-36.3	-38.6333	-33.3	-30.8	-33.8	-32.6333	-27.2	-32.5	-33.8	-31.1667	-25.5	-31	-26.8	-27.7667	-22.8	-26.8	-23	-24.2
8	-38.7	-41.1	-35.1	-38.3	-32.5	-30.2	-33.5	-32.0667	-26.6	-31.8	-32.2	-30.2	-24.2	-29	-23.6	-25.6	-21.2	-24.2	-21.7	-22.3667
8.5	-37.1	-40.5	-35.5	-37.7	-31.8	-29.5	-32.7	-31.3333	-25.8	-30.3	-31.5	-29.2	-22.7	-28.3	-23.2	-24.7333	-19.5	-23.5	-19.3	-20.7667
9	-34	-39.2	-34.2	-35.8	-30.4	-28.1	-31.4	-29.9667	-24.5	-30.7	-31.1	-28.7667	-21.4	-26.6	-21.1	-23.0333	-18.1	-21.1	-18.6	-19.2667
9.5	-33.8	-37.8	-33.8	-35.1333	-30.6	-27.2	-31.3	-29.7	-22.7	-29.2	-30.2	-27.3667	-20.8	-24.9	-19.2	-21.6333	-16.2	-20.2	-17.9	-18.1
10	-32.5	-37.9	-31.6	-34	-29.7	-27.6	-30.7	-29.3333	-21.4	-27.6	-29.6	-26.2	-19.5	-23.7	-18.6	-20.6	-15.6	-18.6	-15.7	-16.6333
10.5	-27.3	-35.5	-30.5	-31.1	-29.1	-26.9	-29.5	-28.5	-20.5	-26.3	-28.9	-25.2333	-18.9	-22.9	-17.9	-19.9	-14.9	-17.2	-14.9	-15.6667
11	-26.7	-34.2	-29.2	-30.0333	-27.5	-25.4	-29.2	-27.3667	-19.1	-25.7	-28.4	-24.4	-18.1	-20.3	-16.4	-18.2667	-14.4	-16.4	-15.3	-15.3667
11.5	-25.3	-31.4	-27.4	-28.0333	-26.2	-24	-28.2	-26.1333	-18.2	-23.3	-27	-22.8333	-16.9	-19.8	-15.2	-17.3	-13.2	-15.7	-15.8	-14.9
12	-24.5	-29.8	-26.8	-27.0333	-25.3	-23.5	-28.3	-25.7	-19.6	-22.9	-26.5	-23	-14.5	-18.9	-13.5	-15.6333	-12.5	-15.3	-13.9	-13.9
12.5	-24.2	-27.6	-25.6	-25.8	-24.3	-23.4	-27.6	-25.1	-17.9	-21.2	-25	-21.3667	-14.3	-17.9	-13	-15.0667	-11.2	-14.3	-12.5	-12.6667
13	-22	-26.6	-25	-24.5333	-23.6	-22.2	-26.5	-24.1	-16.4	-20.4	-25.2	-20.6667	-13.4	-17.5	-12.2	-14.3667	-11	-13.2	-11.7	-11.9667
13.5	-21.5	-24	-24.6	-23.3667	-23.5	-21.6	-25.6	-23.5667	-14	-19.8	-23.6	-19.1333	-12.7	-16	-11.6	-13.4333	-10.3	-12.8	-10.1	-11.0667
14	-20.3	-23.1	-22.1	-21.8333	-22.6	-21.3	-24.8	-22.9	-13.5	-17.7	-23.3	-18.1667	-12.5	-15.6	-10.9	-13	-9.3	-12.6	-9.6	-10.5
14.5	-20.6	-23.6	-20.6	-21.6	-21.8	-20.5	-25.1	-22.4667	-12	-17.6	-22.5	-17.3667	-11	-14.3	-9.5	-11.6	-8.5	-10.5	-8.9	-9.3
15	-19.4	-21.3	-19.3	-20	-20.1	-19.5	-24.2	-21.2667	-11.2	-16.3	-21.5	-16.3333	-10.3	-13.4	-9.3	-11	-7.5	-10.2	-7.1	-8.26667
15.5	-18.7	-20.7	-17.7	-19.0333	-20.2	-18.9	-23.7	-20.9333	-10.6	-15.9	-20.9	-15.8	-9.8	-12.7	-8.9	-10.4667	-6.9	-9.4	-7.2	-7.83333
16	-18.2	-19.5	-17.5	-18.4	-19.6	-18.2	-22.6	-20.1333	-9.3	-15.5	-19.2	-14.6667	-8.9	-12.2	-7.2	-9.43333	-6.2	-8.3	-6.4	-6.96667
16.5	-17.6	-19.2	-16.2	-17.6667	-18.8	-17.1	-21.8	-19.2333	-9.5	-14.7	-18.8	-14.3333	-8.5	-11.7	-6.8	-9	-5.1	-7.6	-5.5	-6.06667
17	-16.4	-18.8	-15.8	-17	-17.9	-16.8	-20.2	-18.3	-8.5	-14.4	-18.1	-13.6667	-8.1	-10.3	-6.1	-8.16667	-4.6	-7.4	-4.5	-5.5
17.5	-15.8	-17.4	-15.4	-16.2	-17.2	-15.7	-19.9	-17.6	-7.9	-13.8	-17.7	-13.1333	-7.7	-9.6	-5.7	-7.66667	-4.4	-6.8	-3.7	-4.96667
18	-14.3	-17.6	-14.6	-15.5	-16.7	-14.5	-19.7	-16.9667	-7.2	-12.5	-16.5	-12.0667	-7.5	-8.9	-5.5	-7.3	-3.6	-5.2	-3.3	-4.03333
18.5	-14.6	-16.3	-12.3	-14.4	-15.4	-13.9	-18.4	-15.9	-6.1	-12.2	-15.9	-11.4	-6.2	-8.5	-4.9	-6.53333	-2.7	-5	-2.8	-3.5
19	-13.2	-16.5	-12.5	-14.0667	-15.1	-13.7	-17.1	-15.3	-5.8	-10.5	-15.7	-10.6667	-5.9	-8.3	-4.7	-6.3	-2.5	-4.7	-1.9	-3.03333
19.5	-13.5	-15.7	-11.7	-13.6333	-14.6	-12.4	-16.6	-14.5333	-5.4	-9.9	-14.4	-9.9	-5.7	-7.8	-4.4	-5.96667	-2.3	-3.6	-0.2	-2.03333
20	-12.8	-14.9	-10.9	-12.8667	-13.4	-11.8	-15.4	-13.5333	-4.9	-9.3	-13.8	-9.33333	-5.4	-7.5	-3.8	-5.56667	-1.7	-3.2	0.9	-1.33333
20.5	-11.1	-14.4	-9.4	-11.6333	-13.9	-10.2	-14.9	-13	-4.5	-8.4	-12.2	-8.36667	-4.5	-7.2	-3.6	-5.1	-0.9	-2.6	1.5	-0.666667
21	-10.6	-13.1	-9.1	-10.9333	-12.1	-10.6	-15.1	-12.6	-3.7	-7.7	-11.6	-7.66667	-4.3	-6.8	-3.2	-4.76667	0.1	-1.8	1.7	0
21.5	-9.4	-12.3	-8.3	-10	-11.9	-9.3	-13.2	-11.4667	-3.4	-7.4	-10.3	-7.03333	-4	-6.4	-2.5	-4.3	1.3	-0.7	1.9	0.833333
22	-9.1	-11.8	-8.8	-9.9	-11.2	-9.5	-12.9	-11.2	-2.8	-6.2	-9.9	-6.3	-3.7	-6.4	-2.2	-4.1	1.8	0.8	2.1	1.56667
22.5	-8.7	-11.5	-7.5	-9.23333	-10.3	-8.9	-11.3	-10.1667	-2.2	-5.7	-9.5	-5.8	-3.4	-5.7	-1.9	-3.66667	2.2	1	2.8	2
23	-7.3	-10.4	-7.4	-8.36667	-10.9	-7.8	-10.9	-9.86667	-1.6	-5.5	-9.4	-5.5	-3	-5.3	-0.8	-3.03333	2.5	1.6	3.1	2.4
23.5	-7.5	-10.6	-6.6	-8.23333	-9.6	-7.3	-9.2	-8.7	-1.3	-5.1	-8.3	-4.9	-2.5	-4.2	0.3	-2.13333	2.6	2.3	3.6	2.83333
24	-6.2	-9.7	-5.7	-7.2	-9.2	-6.5	-9.6	-8.43333	-1.5	-4.8	-7.5	-4.6	-2.3	-3.8	1.5	-1.53333	3.3	3.3	4.3	3.63333
24.5	-5.7	-8.7	-4.7	-6.36667	-8.4	-5.7	-8.4	-7.5	-0.9	-4.2	-7.2	-4.1	-1.5	-3.8	1.7	-1.2	4.7	3.7	4.5	4.3
25	-4.8	-8.5	-4.5	-5.93333	-7.8	-5.5	-7.8	-7.03333	-0.8	-3.9	-6.5	-3.73333	-1.2	-3	2.5	-0.566667	4.8	4.4	5.3	4.83333
25.5	-5.2	-7.8	-3.8	-5.6	-7.3	-4.7	-7.6	-6.53333	-0.3	-3.5	-6.1	-3.3	-0.3	-2.6	2.6	-0.1	5.3	4.2	5.4	4.96667
26	-4.6	-7.6	-3.6	-5.26667	-6.6	-4.5	-7.2	-6.1	0.5	-3.2	-4.5	-2.4	0.1	-2.4	2.9	0.2	5.9	5.6	6.1	5.86667
26.5	-4.4	-7.3	-3.3	-5	-5.7	-4.3	-6	-5.33333	0.7	-2.6	-4.3	-2.06667	0.5	-1.9	3.3	0.633333	6.4	5.9	6.8	6.36667
27	-3.7	-6.9	-2.9	-4.5	-5.5	-3.7	-5.7	-4.96667	1.5	-2.1	-3.7	-1.43333	1.2	-1.2	3.4	1.13333	7.1	6.5	7.5	7.03333
27.5	-3.5	-6.5	-1.5	-3.83333	-5	-3.4	-5.4	-4.6	1.7	-1.3	-2.4	-0.666667	1.7	-0.4	3.7	1.66667	7.3	6.7	7.8	7.26667
28	-2.7	-5.8	-1.8	-3.43333	-4.5	-2.6	-6.6	-4.56667	2.5	-0.9	-2.6	-0.333333	2.5	0.5	4.2	2.4	8.4	7.8	8.5	8.23333
28.5	-2.5	-5.6	-0.6	-2.9	-4.2	-2.2	-6.2	-4.2	2.8	0.4	-1.2	0.666667	2.7	1.3	4.6	2.86667	8.8	8.4	8.7	8.63333
29	-2.6	-5.2	0.2	-2.53333	-3.8	-1.7	-5.3	-3.6	2.7	1.2	-0.7	1.06667	3.3	1.7	4.7	3.23333	9.4	8.8	9.4	9.2
29.5	-2.3	-4.9	0.7	-2.16667	-3.3	-1.5	-4.8	-3.2	3.4	2.3	0.5	2.06667	3.4	2.3	5.2	3.63333	9.5	9.5	10.2	9.73333
30	-2.2	-4.7	1.4	-1.83333	-3.2	-1.2	-4.2	-2.86667	3.6	2.7	1.2	2.5	4.2	2.6	5.4	4.06667	9.7	10.3	10.6	10.2
30.5	-1.8	-4.4	1.5	-1.56667	-2.7	-0.5	-3.7	-2.3	4.2	3.8	1.5	3.16667	4.5	3.2	5.7	4.46667	10.2	10.9	10.7	10.6
31	-1.5	-4.5	1.7	-1.43333	-1.4	0	-3.4	-1.6	4.5	4.2	2.4	3.7	4.8	3.5	6.4	4.9	10.5	11.5	11.4	11.1333
31.5	0	-3.2	2.3	-0.3	-1.2	0.4	-3.2	-1.33333	4.7	5	2.9	4.2	5.3	3.6	6.9	5.26667	11.1	12	11.7	11.6
32	0.3	-2.9	2.8	0.0666667	0	0.9	-2.8	-0.633333	5.2	6.3	3.4	4.96667	5.6	4.1	7.4	5.7	11.7	12.3	12.8	12.2667
32.5	0.5	-2.7	2.7	0.166667	0	1.5	-2.4	-0.3	5.5	6.7	3.5	5.23333	6.3	4.7	7.5	6.16667	11.8	12.7	13.3	12.6
33	0.6	-2.4	3.3	0.5	0.2	1.9	-1.5	0.2	5.4	7.2	3.8	5.46667	6.8	4.9	7.7	6.46667	12.1	13.2	13.9	13.0667
33.5	0.5	-1.3	3.5	0.9	0.4	2.1	-0.8	0.566667	5.9	7.5	4.1	5.83333	7	5	8.1	6.7	12.8	13.8	14.5	13.7
34	0.3	-1.1	3.6	0.933333	0.7	2.5	-0.3	0.966667	6.4	8.8	4.5	6.56667	7.2	5.3	8.5	7	13.1	14.3	14.8	14.0667
34.5	0.5	-0.5	3.8	1.26667	1.3	2.4	0.2	1.3	6.8	9.1	4.8	6.9	7.4	5.4	8.4	7.06667	13.5	14.6	14.2	14.1
35	0.8	0.3	4.4	1.83333	1.6	3.3	1.7	2.2	7.5	9.7	5.3	7.5	7.6	5.6	8.8	7.33333	13.7	15.5	14.6	14.6

## Sheet: 2Quenching method (average)
Quenching method-the lower clamp (average)
Time (minutes)	Average temperature of the fixed jaw plate (°C)	Average temperature of the clamp jaws (°C)	Average temperature of movable jaw plate (°C)	Average temperature of the tendon at 1cm proximity to the clamp jaws (°C)	Average temperature of the tendon at 2cm proximity to the clamp jaws (°C)
0	24	24.2	24.2333	26.1667	26.4
0.5	14.0667	15.1667	15.5667	12.5333	14.7
1	-18.0667	-13.8667	-16.0333	-12.1333	-9.26667
1.5	-172.967	-24	-22.4	-135.767	-74
2	-49.8	-43.3667	-43.3333	-45.5	-41.4667
2.5	-48.8	-43.0667	-43.1	-43.9333	-39.7667
3	-47.1	-41.2333	-41.6333	-42.6	-38.0667
3.5	-46.8333	-40.9	-40.5333	-40.5333	-36
4	-45.0333	-39.3667	-38.9	-38.7667	-34.0667
4.5	-44.2333	-38.8	-36.9	-36.4	-32.2
5	-42.7667	-37.5333	-36.1667	-35	-31.1667
5.5	-42.3333	-36.9333	-35.4333	-33.3	-29.4
6	-41.5	-36.1	-34.5333	-31.9	-28.7333
6.5	-40.7	-35.0333	-33	-30.8	-26.5
7	-39.8667	-33.9	-32.2667	-29.3667	-25.6333
7.5	-38.6333	-32.6333	-31.1667	-27.7667	-24.2
8	-38.3	-32.0667	-30.2	-25.6	-22.3667
8.5	-37.7	-31.3333	-29.2	-24.7333	-20.7667
9	-35.8	-29.9667	-28.7667	-23.0333	-19.2667
9.5	-35.1333	-29.7	-27.3667	-21.6333	-18.1
10	-34	-29.3333	-26.2	-20.6	-16.6333
10.5	-31.1	-28.5	-25.2333	-19.9	-15.6667
11	-30.0333	-27.3667	-24.4	-18.2667	-15.3667
11.5	-28.0333	-26.1333	-22.8333	-17.3	-14.9
12	-27.0333	-25.7	-23	-15.6333	-13.9
12.5	-25.8	-25.1	-21.3667	-15.0667	-12.6667
13	-24.5333	-24.1	-20.6667	-14.3667	-11.9667
13.5	-23.3667	-23.5667	-19.1333	-13.4333	-11.0667
14	-21.8333	-22.9	-18.1667	-13	-10.5
14.5	-21.6	-22.4667	-17.3667	-11.6	-9.3
15	-20	-21.2667	-16.3333	-11	-8.26667
15.5	-19.0333	-20.9333	-15.8	-10.4667	-7.83333
16	-18.4	-20.1333	-14.6667	-9.43333	-6.96667
16.5	-17.6667	-19.2333	-14.3333	-9	-6.06667
17	-17	-18.3	-13.6667	-8.16667	-5.5
17.5	-16.2	-17.6	-13.1333	-7.66667	-4.96667
18	-15.5	-16.9667	-12.0667	-7.3	-4.03333
18.5	-14.4	-15.9	-11.4	-6.53333	-3.5
19	-14.0667	-15.3	-10.6667	-6.3	-3.03333
19.5	-13.6333	-14.5333	-9.9	-5.96667	-2.03333
20	-12.8667	-13.5333	-9.33333	-5.56667	-1.33333
20.5	-11.6333	-13	-8.36667	-5.1	-0.666667
21	-10.9333	-12.6	-7.66667	-4.76667	0
21.5	-10	-11.4667	-7.03333	-4.3	0.833333
22	-9.9	-11.2	-6.3	-4.1	1.56667
22.5	-9.23333	-10.1667	-5.8	-3.66667	2
23	-8.36667	-9.86667	-5.5	-3.03333	2.4
23.5	-8.23333	-8.7	-4.9	-2.13333	2.83333
24	-7.2	-8.43333	-4.6	-1.53333	3.63333
24.5	-6.36667	-7.5	-4.1	-1.2	4.3
25	-5.93333	-7.03333	-3.73333	-0.566667	4.83333
25.5	-5.6	-6.53333	-3.3	-0.1	4.96667
26	-5.26667	-6.1	-2.4	0.2	5.86667
26.5	-5	-5.33333	-2.06667	0.633333	6.36667
27	-4.5	-4.96667	-1.43333	1.13333	7.03333
27.5	-3.83333	-4.6	-0.666667	1.66667	7.26667
28	-3.43333	-4.56667	-0.333333	2.4	8.23333
28.5	-2.9	-4.2	0.666667	2.86667	8.63333
29	-2.53333	-3.6	1.06667	3.23333	9.2
29.5	-2.16667	-3.2	2.06667	3.63333	9.73333
30	-1.83333	-2.86667	2.5	4.06667	10.2
30.5	-1.56667	-2.3	3.16667	4.46667	10.6
31	-1.43333	-1.6	3.7	4.9	11.1333
31.5	-0.3	-1.33333	4.2	5.26667	11.6
32	0.0666667	-0.633333	4.96667	5.7	12.2667
32.5	0.166667	-0.3	5.23333	6.16667	12.6
33	0.5	0.2	5.46667	6.46667	13.0667
33.5	0.9	0.566667	5.83333	6.7	13.7
34	0.933333	0.966667	6.56667	7	14.0667
34.5	1.26667	1.3	6.9	7.06667	14.1
35	1.83333	2.2	7.5	7.33333	14.6

## Sheet: 3Unilateral cooling-upper clamp
Unilateral cooling method-the upper clamp
Time (minutes)	Temperature of the fixed jaw plate (°C)			Average temperature of the fixed jaw plate (°C)	Temperature of the clamp jaws (°C)			Average temperature of the clamp jaws (°C)	Temperature of the movable jaw plate (°C)			Average temperature of the movable jaw plate (°C)	Temperature of the tendon at 1cm proximity to the clamp jaws (°C)			Average temperature of the tendon at 1cm proximity to the clamp jaws (°C)	Temperature of the tendon at 2cm proximity to the clamp jaws (°C)			Average temperature of the tendon at 2cm proximity to the clamp jaws (°C)
0	23.5	24.8	24.3	24.2	25.1	24.4	24.8	24.7667	23.5	24.9	23.4	23.9333	26.4	25.7	26.5	26.2	26.3	25.9	26.6	26.2667
0.5	19.9	20.1	17.3	19.1	24.8	23.7	23.6	24.0333	23.1	22.8	22.6	22.8333	22.6	23.6	24.1	23.4333	24.8	23.6	24.2	24.2
1	6.4	6.2	4.8	5.8	22.5	21.1	21.5	21.7	21.1	20.5	20.1	20.5667	16.1	14.8	17.1	16	22.5	21.5	22.8	22.2667
1.5	4.7	4	3.2	3.96667	19.4	18.5	17.2	18.3667	20.5	17.2	18.8	18.8333	13.8	11.5	14.5	13.2667	18.2	17.2	19.5	18.3
2	3.2	2.1	1.7	2.33333	13.9	11.2	10.3	11.8	17.2	15.3	15.4	15.9667	11.4	12.4	13.2	12.3333	20.3	19.3	20.4	20
2.5	-1.9	0.7	-1.4	-0.866667	8.8	8.1	7.3	8.06667	14.1	12.3	13.7	13.3667	9.7	10.1	11.4	10.4	21.3	19.6	22.1	21
3	-16.1	-14.3	-18.6	-16.3333	7.5	7.6	4.7	6.6	13.6	10.7	10.5	11.6	5.5	5.3	7.6	6.13333	16.7	17.7	18.3	17.5667
3.5	-18.9	-16.5	-20.8	-18.7333	-0.6	-1.5	-2.5	-1.53333	11.5	7.5	7.6	8.86667	5.6	7.6	6.5	6.56667	17.5	16.5	18.6	17.5333
4	-16.6	-16.2	-19.5	-17.4333	-4.3	-5.2	-7	-5.5	8.2	4	4.3	5.5	6.3	8.8	8.2	7.76667	18.4	17.2	20.8	18.8
4.5	-16.3	-15.8	-17.7	-16.6	-5.8	-7.4	-9.3	-7.5	7.4	2.3	3.1	4.26667	8.1	10.3	9.4	9.26667	20.3	19.3	21.3	20.3
5	-15.7	-14.4	-16.3	-15.4667	-7.5	-8.8	-10.6	-8.96667	4.8	1.6	1.3	2.56667	9.3	12.7	11.8	11.2667	21.6	19.6	21.7	20.9667
5.5	-14.1	-13.2	-15.6	-14.3	-8.2	-9.6	-11.4	-9.73333	1.6	-1.4	-0.5	-0.1	7.5	11.1	9.6	9.4	19.4	18.4	20.1	19.3
6	-36.4	-33.6	-38.9	-36.3	-9.7	-11.6	-12.7	-11.3333	-0.6	-3.7	-2.2	-2.16667	2.2	3.2	5.6	3.66667	16.7	14.7	17.2	16.2
6.5	-41.5	-39.1	-40.6	-40.4	-16.9	-18	-19.3	-18.0667	-3	-5.3	-4.4	-4.23333	-1.4	-0.5	1.3	-0.2	16.3	15.3	17.5	16.3667
7	-36.3	-34.9	-37.7	-36.3	-18.6	-19.1	-20.5	-19.4	-4.1	-7.5	-6.8	-6.13333	0.8	2.7	3.1	2.2	18.5	16.5	19.7	18.2333
7.5	-52.6	-48.3	-53.3	-51.4	-23.3	-25.6	-26.8	-25.2333	-6.3	-8.2	-7.9	-7.46667	-1.9	-1.5	-0.3	-1.23333	17.2	16.8	18.5	17.5
8	-53.4	-52.6	-54.1	-53.3667	-27.5	-28.3	-30.2	-28.6667	-8.4	-10.6	-9.1	-9.36667	-3.1	-2.2	-2.4	-2.56667	14.6	13.2	15.2	14.3333
8.5	-51.2	-46.4	-52.5	-50.0333	-28.8	-29.7	-32.5	-30.3333	-9	-11.8	-10.6	-10.4667	1.6	4.7	2	2.76667	16.8	15.5	17.7	16.6667
9	-48.8	-47.9	-50.2	-48.9667	-31.4	-32.8	-35.1	-33.1	-9.8	-12.5	-11.3	-11.2	4.3	7.4	5.8	5.83333	16.5	16.1	17.4	16.6667
9.5	-67.5	-65.1	-69.8	-67.4667	-33.6	-35.2	-36.2	-35	-10.2	-14.7	-13.2	-12.7	-0.2	4.8	3.2	2.6	15.7	15.2	15.8	15.5667
10	-70	-67.5	-71.6	-69.7	-35.7	-36.8	-38.6	-37.0333	-13.6	-15.4	-13.6	-14.2	-2.6	0.5	-0.6	-0.9	13.4	12.6	14.5	13.5
10.5	-66.3	-64.6	-67.5	-66.1333	-39.1	-41.4	-41.9	-40.8	-14.4	-16.5	-14.7	-15.2	0.7	1.9	-0.4	0.733333	14.5	12.9	14.9	14.1
11	-59.9	-57.3	-61.2	-59.4667	-40.5	-39.6	-40.4	-40.1667	-15.8	-17.1	-16.8	-16.5667	1.8	3.1	1.8	2.23333	16.1	14.4	15.1	15.2
11.5	-57.5	-56.8	-59.4	-57.9	-39.2	-40.3	-39	-39.5	-17.2	-18.2	-17.3	-17.5667	2.3	3.9	2.2	2.8	16.2	15.2	15.9	15.7667
12	-57.3	-55.5	-57.8	-56.8667	-40.3	-39.5	-39.5	-39.7667	-17.8	-19.6	-18.7	-18.7	4.7	4.5	2.8	4	16.6	15.5	16.3	16.1333
12.5	-58.7	-56.2	-54.6	-56.5	-38.3	-38.7	-38.4	-38.4667	-18.4	-21.9	-19.2	-19.8333	4.2	4.3	3.4	3.96667	16.8	16	16.5	16.4333
13	-55.9	-54.7	-51.6	-54.0667	-39.6	-37.2	-37.2	-38	-19.6	-20.4	-21.6	-20.5333	4.6	5.4	3.6	4.53333	17.3	16.2	16.4	16.6333
13.5	-55.4	-53.2	-49	-52.5333	-38.5	-36.8	-36.6	-37.3	-21.3	-21	-20.3	-20.8667	5.3	5.5	4.3	5.03333	17.2	16.3	16.7	16.7333
14	-51.8	-53.6	-48.1	-51.1667	-37.6	-36.1	-35.3	-36.3333	-19.5	-20.5	-18.9	-19.6333	5.9	5.7	4.2	5.26667	16.9	16.3	16.7	16.6333
14.5	-51.4	-51.3	-47.6	-50.1	-36.8	-35.3	-35.5	-35.8667	-18.7	-19	-19.2	-18.9667	6.2	6	4.5	5.56667	17.3	16.5	16.8	16.8667
15	-49.1	-50.6	-46.3	-48.6667	-36.1	-34.8	-34.5	-35.1333	-18.2	-19.2	-18.4	-18.6	6.4	6.3	4.7	5.8	17.5	16.5	17.3	17.1
15.5	-48.5	-47.8	-45.7	-47.3333	-35.2	-32.5	-33.9	-33.8667	-17.8	-18.6	-18.8	-18.4	6.8	6.8	5.2	6.26667	17.5	16.9	17.5	17.3
16	-46	-47.5	-45.5	-46.3333	-33.6	-30.4	-31.2	-31.7333	-16.1	-18.3	-17.7	-17.3667	6.7	7.9	5.6	6.73333	17.7	17.2	17.5	17.4667
16.5	-44.7	-46.3	-43.2	-44.7333	-32.8	-30.6	-29.1	-30.8333	-15.3	-17.5	-16.3	-16.3667	7.3	7.5	5.3	6.7	17.8	17.1	17.7	17.5333
17	-42.1	-45.7	-42.8	-43.5333	-30.2	-29.7	-27.8	-29.2333	-15.8	-16.5	-16.6	-16.3	7.6	8.1	5.8	7.16667	18.1	17.3	17.6	17.6667
17.5	-41.5	-43.1	-43.4	-42.6667	-29.9	-27.7	-26.7	-28.1	-14.5	-16.9	-16.3	-15.9	7.3	8.5	6.5	7.43333	18.4	17.5	17.8	17.9
18	-39.6	-42.5	-41.6	-41.2333	-27.7	-25.5	-25.5	-26.2333	-14.4	-15.2	-15.9	-15.1667	7.7	8.7	6.4	7.6	18.6	17.6	17.8	18
18.5	-38.7	-42.9	-39.3	-40.3	-26.4	-24.8	-23.9	-25.0333	-14.6	-15.1	-14.7	-14.8	7.9	9.2	6.6	7.9	18.6	17.7	17.9	18.0667
19	-36.2	-41.3	-38.5	-38.6667	-26.1	-23.6	-22.7	-24.1333	-13.7	-14.8	-14.2	-14.2333	8.2	9.9	7.1	8.4	18.8	17.7	18.1	18.2
19.5	-35.9	-39	-37.7	-37.5333	-25.6	-21.3	-20.4	-22.4333	-12.7	-13.7	-14.4	-13.6	8.4	9.4	7.5	8.43333	18.9	17.8	18.3	18.3333
20	-33.4	-37.5	-35.9	-35.6	-23.4	-20.9	-20.8	-21.7	-12.5	-13.5	-13.8	-13.2667	8.8	9.7	7.8	8.76667	19.2	17.7	18.4	18.4333
20.5	-31	-36.6	-34.4	-34	-22.9	-19.5	-19.2	-20.5333	-11.8	-12.9	-12.2	-12.3	9.2	9.5	8.3	9	19.3	17.9	18.6	18.6
21	-30.8	-35.8	-32.1	-32.9	-21.1	-18.8	-18.6	-19.5	-10.6	-12.7	-11.5	-11.6	9.5	10.3	8.6	9.46667	19.4	18.1	18.5	18.6667
21.5	-28.5	-32.1	-31.3	-30.6333	-19.2	-17.6	-18.3	-18.3667	-9.3	-11.4	-11.1	-10.6	9.8	10	8.9	9.56667	19.5	18.3	18.7	18.8333
22	-27.9	-30.9	-30.8	-29.8667	-18.9	-15.2	-17.5	-17.2	-9.9	-10.8	-10.9	-10.5333	9.9	10.4	9	9.76667	19.6	18.3	18.7	18.8667
22.5	-26.3	-29.7	-28.5	-28.1667	-17.3	-14.7	-16.9	-16.3	-9.5	-10.2	-9.4	-9.7	10.4	10.7	9.5	10.2	19.5	18.5	18.8	18.9333
23	-25.8	-28.6	-27.4	-27.2667	-16.9	-14.4	-15.8	-15.7	-8.8	-9.6	-9.5	-9.3	10.5	11	9.8	10.4333	19.7	18.5	18.7	18.9667
23.5	-23.3	-27.8	-26.6	-25.9	-15.2	-13.9	-15.3	-14.8	-8.6	-8.3	-9.7	-8.86667	10.7	11.3	9.6	10.5333	19.7	18.6	18.9	19.0667
24	-22.1	-26.2	-25.7	-24.6667	-14.6	-12.5	-13.5	-13.5333	-7.2	-8.5	-8.2	-7.96667	11.2	11.5	10.2	10.9667	19.8	18.7	19.1	19.2
24.5	-21.2	-25.9	-23.7	-23.6	-14.4	-11.2	-12.7	-12.7667	-6.7	-7.9	-7.2	-7.26667	11.2	12.5	10.4	11.3667	20	18.7	19	19.2333
25	-20.4	-25.1	-22.5	-22.6667	-13.8	-10.4	-11.5	-11.9	-6.4	-6.8	-7.5	-6.9	11.5	12	10.7	11.4	20.2	18.8	19.2	19.4
25.5	-20.2	-23.4	-21.8	-21.8	-12.3	-10.7	-10.7	-11.2333	-5.9	-6.3	-6.1	-6.1	11.8	12.3	10.9	11.6667	20.1	18.7	19.4	19.4
26	-19.1	-22.1	-20.6	-20.6	-11.6	-9.9	-9.5	-10.3333	-4.5	-5.5	-5.8	-5.26667	12.1	12.6	11.2	11.9667	20.2	18.9	19.4	19.5
26.5	-18	-20.6	-20.3	-19.6333	-10	-9.3	-8.3	-9.2	-3.2	-5.7	-4.2	-4.36667	12.2	13.5	11.5	12.4	20.3	19	19.3	19.5333
27	-20.5	-19.4	-19.9	-19.9333	-9.5	-8.1	-7.7	-8.43333	-3.4	-4.5	-4.9	-4.26667	12.9	13.2	11.4	12.5	20.4	19.1	19.4	19.6333
27.5	-18.4	-18.9	-17.5	-18.2667	-9.7	-7.5	-6.4	-7.86667	-2.7	-3.7	-3.5	-3.3	13.5	13.7	11.7	12.9667	20.4	19.3	19.5	19.7333
28	-17.8	-17	-16.8	-17.2	-8.2	-6	-6.6	-6.93333	-2.9	-3.5	-2.2	-2.86667	13.2	14.5	11.9	13.2	20.4	19.4	19.6	19.8
28.5	-16.1	-16.5	-15.6	-16.0667	-7.5	-6.4	-5.2	-6.36667	-1.3	-2.3	-2.6	-2.06667	13.6	14.3	12.3	13.4	20.5	19.3	19.7	19.8333
29	-15.3	-15.7	-14.2	-15.0667	-7.3	-5.9	-4.7	-5.96667	-0.1	-2.7	-1.1	-1.3	14.1	14.7	13.1	13.9667	20.5	19.4	19.7	19.8667
29.5	-14.9	-14.3	-14.7	-14.6333	-6.8	-4	-3.5	-4.76667	-0.5	-1.4	-0.3	-0.733333	14.3	15.3	13.5	14.3667	20.6	19.5	19.8	19.9667
30	-12.1	-12.9	-13.4	-12.8	-5.2	-3.7	-2.2	-3.7	1	-1.6	-0.9	-0.5	14.9	15	13.9	14.6	20.5	19.5	19.9	19.9667
30.5	-12.6	-11.2	-12.9	-12.2333	-4.7	-3.2	-2.5	-3.46667	1.4	-0.2	0.4	0.533333	15.4	15.2	14.4	15	20.6	19.6	20.3	20.1667
31	-10.3	-10.6	-11.5	-10.8	-3.4	-2.1	-1.4	-2.3	2.9	0.7	1.2	1.6	15.2	15.4	14.5	15.0333	20.6	19.5	19.8	19.9667
31.5	-9.1	-9.4	-10.2	-9.56667	-3.2	-1.5	-1.9	-2.2	3	1.5	1.6	2.03333	15.6	15.7	14.7	15.3333	20.7	19.7	19.8	20.0667
32	-7.3	-8.8	-9.4	-8.5	-2.4	-0.9	-0.4	-1.23333	3.7	1.2	2.3	2.4	15.7	16.1	14.9	15.5667	20.7	19.7	20.1	20.1667
32.5	-7.5	-7.3	-8.7	-7.83333	-1.8	-0.6	1.8	-0.2	4.2	2.5	3.8	3.5	15.8	16.3	15.2	15.7667	20.8	19.8	20.3	20.3
33	-6.1	-7.6	-8.9	-7.53333	-0.5	1.3	2.5	1.1	5.1	2.4	3.2	3.56667	16.2	16.8	15.1	16.0333	20.7	19.8	20.5	20.3333
33.5	-5.9	-7	-7.3	-6.73333	0.3	2.7	2.1	1.7	5.5	3.9	4	4.46667	16.2	17	15.5	16.2333	20.9	19.8	20.6	20.4333
34	-5.4	-6.5	-6.1	-6	1.8	3.4	3.5	2.9	6.9	4.4	5.3	5.53333	16.3	17.6	15.9	16.6	21.1	20.1	20.5	20.5667
34.5	-4.2	-5.7	-5.5	-5.13333	1.2	3.5	4.4	3.03333	7.6	4.8	5.7	6.03333	16.7	17.4	15.6	16.5667	21.3	20.1	20.7	20.7
35	-3.6	-5.2	-4	-4.26667	2.7	4.1	5.3	4.03333	7.3	5.5	6.2	6.33333	16.8	17.2	16.3	16.7667	21.3	20.4	20.9	20.8667

## Sheet: 3Unilateral cooling (average)
Unilateral cooling method-the upper clamp (average)
Time (minutes)	Average temperature of the fixed jaw plate (°C)	Average temperature of the clamp jaws (°C)	Average temperature of movable jaw plate (°C)	Average temperature of the tendon at 1cm proximity to the clamp jaws (°C)	Average temperature of the tendon at 2cm proximity to the clamp jaws (°C)
0	24.2	24.7667	23.9333	26.2	26.2667
0.5	19.1	24.0333	22.8333	23.4333	24.2
1	5.8	21.7	20.5667	16	22.2667
1.5	3.96667	18.3667	18.8333	13.2667	18.3
2	2.33333	11.8	15.9667	12.3333	20
2.5	-0.866667	8.06667	13.3667	10.4	21
3	-16.3333	6.6	11.6	6.13333	17.5667
3.5	-18.7333	-1.53333	8.86667	6.56667	17.5333
4	-17.4333	-5.5	5.5	7.76667	18.8
4.5	-16.6	-7.5	4.26667	9.26667	20.3
5	-15.4667	-8.96667	2.56667	11.2667	20.9667
5.5	-14.3	-9.73333	-0.1	9.4	19.3
6	-36.3	-11.3333	-2.16667	3.66667	16.2
6.5	-40.4	-18.0667	-4.23333	-0.2	16.3667
7	-36.3	-19.4	-6.13333	2.2	18.2333
7.5	-51.4	-25.2333	-7.46667	-1.23333	17.5
8	-53.3667	-28.6667	-9.36667	-2.56667	14.3333
8.5	-50.0333	-30.3333	-10.4667	2.76667	16.6667
9	-48.9667	-33.1	-11.2	5.83333	16.6667
9.5	-67.4667	-35	-12.7	2.6	15.5667
10	-69.7	-37.0333	-14.2	-0.9	13.5
10.5	-66.1333	-40.8	-15.2	0.733333	14.1
11	-59.4667	-40.1667	-16.5667	2.23333	15.2
11.5	-57.9	-39.5	-17.5667	2.8	15.7667
12	-56.8667	-39.7667	-18.7	4	16.1333
12.5	-56.5	-38.4667	-19.8333	3.96667	16.4333
13	-54.0667	-38	-20.5333	4.53333	16.6333
13.5	-52.5333	-37.3	-20.8667	5.03333	16.7333
14	-51.1667	-36.3333	-19.6333	5.26667	16.6333
14.5	-50.1	-35.8667	-18.9667	5.56667	16.8667
15	-48.6667	-35.1333	-18.6	5.8	17.1
15.5	-47.3333	-33.8667	-18.4	6.26667	17.3
16	-46.3333	-31.7333	-17.3667	6.73333	17.4667
16.5	-44.7333	-30.8333	-16.3667	6.7	17.5333
17	-43.5333	-29.2333	-16.3	7.16667	17.6667
17.5	-42.6667	-28.1	-15.9	7.43333	17.9
18	-41.2333	-26.2333	-15.1667	7.6	18
18.5	-40.3	-25.0333	-14.8	7.9	18.0667
19	-38.6667	-24.1333	-14.2333	8.4	18.2
19.5	-37.5333	-22.4333	-13.6	8.43333	18.3333
20	-35.6	-21.7	-13.2667	8.76667	18.4333
20.5	-34	-20.5333	-12.3	9	18.6
21	-32.9	-19.5	-11.6	9.46667	18.6667
21.5	-30.6333	-18.3667	-10.6	9.56667	18.8333
22	-29.8667	-17.2	-10.5333	9.76667	18.8667
22.5	-28.1667	-16.3	-9.7	10.2	18.9333
23	-27.2667	-15.7	-9.3	10.4333	18.9667
23.5	-25.9	-14.8	-8.86667	10.5333	19.0667
24	-24.6667	-13.5333	-7.96667	10.9667	19.2
24.5	-23.6	-12.7667	-7.26667	11.3667	19.2333
25	-22.6667	-11.9	-6.9	11.4	19.4
25.5	-21.8	-11.2333	-6.1	11.6667	19.4
26	-20.6	-10.3333	-5.26667	11.9667	19.5
26.5	-19.6333	-9.2	-4.36667	12.4	19.5333
27	-19.9333	-8.43333	-4.26667	12.5	19.6333
27.5	-18.2667	-7.86667	-3.3	12.9667	19.7333
28	-17.2	-6.93333	-2.86667	13.2	19.8
28.5	-16.0667	-6.36667	-2.06667	13.4	19.8333
29	-15.0667	-5.96667	-1.3	13.9667	19.8667
29.5	-14.6333	-4.76667	-0.733333	14.3667	19.9667
30	-12.8	-3.7	-0.5	14.6	19.9667
30.5	-12.2333	-3.46667	0.533333	15	20.1667
31	-10.8	-2.3	1.6	15.0333	19.9667
31.5	-9.56667	-2.2	2.03333	15.3333	20.0667
32	-8.5	-1.23333	2.4	15.5667	20.1667
32.5	-7.83333	-0.2	3.5	15.7667	20.3
33	-7.53333	1.1	3.56667	16.0333	20.3333
33.5	-6.73333	1.7	4.46667	16.2333	20.4333
34	-6	2.9	5.53333	16.6	20.5667
34.5	-5.13333	3.03333	6.03333	16.5667	20.7
35	-4.26667	4.03333	6.33333	16.7667	20.8667

## Sheet: 4Unilateral cooling-lower clamp
Unilateral cooling method-the lower clamp
Time (minutes)	Temperature of the fixed jaw plate (°C)			Average temperature of the fixed jaw plate (°C)	Temperature of the clamp jaws (°C)			Average temperature of the clamp jaws (°C)	Temperature of the movable jaw plate (°C)			Average temperature of the movable jaw plate (°C)	Temperature of the tendon at 1cm proximity to the clamp jaws (°C)			Average temperature of the tendon at 1cm proximity to the clamp jaws (°C)	Temperature of the tendon at 2cm proximity to the clamp jaws (°C)			Average temperature of the tendon at 2cm proximity to the clamp jaws (°C)
0	24.2	24.6	23.4	24.0667	23.4	24.7	24.4	24.1667	24.7	24.2	23.8	24.2333	25.8	25.5	26.7	26	26.5	25.9	26.8	26.4
0.5	3.1	5.3	6.9	5.1	18.6	19.8	17.3	18.5667	22.3	23.7	22.6	22.8667	22.4	21	23.5	22.3	24	22.7	23.5	23.4
1	2.2	3.8	4	3.33333	14	15.6	12.1	13.9	21.1	21.1	19.5	20.5667	15.1	14.6	16.5	15.4	22.5	21.9	20.1	21.5
1.5	3.4	2.2	2.7	2.76667	13.4	13.4	10.5	12.4333	18.8	18.5	17.2	18.1667	14.6	12.5	13.2	13.4333	18.2	20.5	19.6	19.4333
2	4.3	1.7	3.2	3.06667	11.3	13.9	9.2	11.4667	17.4	16.2	15.3	16.3	15.8	13.2	14.3	14.4333	19.3	20.9	18.8	19.6667
2.5	-14.7	-17.4	-11	-14.3667	7.3	10.1	8.8	8.73333	15.7	14.1	14.3	14.7	8.4	6.1	7.3	7.26667	17.3	16.9	15.4	16.5333
3	-13.3	-16.2	-13.1	-14.2	1.7	4.5	-0.6	1.86667	12.5	10.6	9.7	10.9333	6.8	5.6	6.7	6.36667	17.7	17.1	16.8	17.2
3.5	-13.5	-17.4	-14.9	-15.2667	-3.5	-1.6	-6.5	-3.86667	10.6	9.5	7.5	9.2	8.5	7.5	8.5	8.16667	18	18.4	16.5	17.6333
4	-15.2	-15.8	-16.6	-15.8667	-6	-3.3	-8.2	-5.83333	9.3	6.2	6	7.16667	10.5	10.2	9	9.9	19.5	19	17.5	18.6667
4.5	-14.8	-14.5	-15.3	-14.8667	-7.3	-5.8	-9.4	-7.5	8.1	5.4	4.3	5.93333	12	11.4	11.3	11.5667	20.3	19.4	18	19.2333
5	-13.4	-19.3	-15.3	-16	-7.6	-6.5	-10.8	-8.3	7.3	3.8	2.6	4.56667	12.3	11.8	12.6	12.2333	20.6	19.6	18.3	19.5
5.5	-34.6	-37.8	-36.4	-36.2667	-9.4	-7.2	-12.6	-9.73333	5.5	3.6	1.4	3.5	7.4	5.6	9.4	7.46667	18.4	16.5	14.4	16.4333
6	-40.1	-43.2	-42.5	-41.9333	-14.7	-9.7	-16.6	-13.6667	2.2	-0.6	-1.7	-0.0333333	1.8	-1.6	3.7	1.3	17.7	15.3	12.8	15.2667
6.5	-35.9	-39.7	-40.1	-38.5667	-18.3	-12.9	-21	-17.4	-1.4	-2	-4.3	-2.56667	4.9	2	3.3	3.4	18.3	17.3	14.9	16.8333
7	-56.7	-59.4	-57.6	-57.9	-21.5	-17.6	-25.1	-21.4	-3.8	-3.1	-6.5	-4.46667	2.9	-0.1	1.5	1.43333	17.5	16.6	13.9	16
7.5	-50.3	-55.3	-53.6	-53.0667	-26.8	-24.3	-28.6	-26.5667	-7.5	-5.6	-8.8	-7.3	0	-1.6	-1.8	-1.13333	16.8	15	12	14.6
8	-51.6	-53.1	-50.4	-51.7	-30.2	-26.5	-33.3	-30	-8.3	-8.9	-11.2	-9.46667	7	2.9	3.2	4.36667	18.2	17.5	13.7	16.4667
8.5	-50.4	-52.5	-48.2	-50.3667	-31.5	-28.8	-35.7	-32	-9.7	-10.4	-12.5	-10.8667	8.3	4.4	6.5	6.4	18.5	17.8	15.3	17.2
9	-66.9	-69.2	-65.8	-67.3	-35.8	-32.4	-36.8	-35	-11.8	-11.8	-13.1	-12.2333	4.6	1.8	3.1	3.16667	17.1	16.2	15.6	16.3
9.5	-70.1	-71.8	-69.5	-70.4667	-39.2	-36.3	-40.2	-38.5667	-14.3	-14.2	-16.2	-14.9	1.9	-1.2	-0.2	0.166667	14.2	14.9	12.9	14
10	-64.5	-68.6	-74	-69.0333	-41.6	-38.7	-41.8	-40.7	-15.7	-17.8	-17.6	-17.0333	2.7	0.8	0.6	1.36667	15.6	16.3	12.7	14.8667
10.5	-60.6	-63.5	-69.3	-64.4667	-40.9	-41.1	-40.4	-40.8	-17.2	-18.4	-19.9	-18.5	4.9	2.4	1.9	3.06667	16.2	17.2	14.9	16.1
11	-59.3	-61.2	-62.9	-61.1333	-38.4	-39.5	-39.6	-39.1667	-19.6	-19.6	-20.4	-19.8667	5.3	2.6	1.4	3.1	16.4	17.4	15.3	16.3667
11.5	-59.8	-57.4	-60.5	-59.2333	-39	-40.2	-40.3	-39.8333	-20.3	-21.3	-22	-21.2	5.8	2.7	2.2	3.56667	16.7	17.8	15.8	16.7667
12	-57.5	-57.8	-59.3	-58.2	-39.5	-38.3	-38.5	-38.7667	-18.9	-19.5	-21.5	-19.9667	5.9	2.9	2.5	3.76667	17.1	18.1	15.9	17.0333
12.5	-57.2	-55.6	-59.2	-57.3333	-37.4	-39.6	-37.7	-38.2333	-19.2	-20.7	-20	-19.9667	5.9	3.2	3	4.03333	17.3	18.2	16.5	17.3333
13	-55.7	-56.6	-58.9	-57.0667	-37.2	-37.5	-36.2	-36.9667	-17.4	-18.2	-19.2	-18.2667	5.9	3.8	3.2	4.3	17.2	18.5	16.7	17.4667
13.5	-52.9	-54	-55.4	-54.1	-36.6	-37.6	-36.8	-37	-18.8	-18.8	-19.6	-19.0667	6	4.1	2.9	4.33333	17.6	18.6	17.1	17.7667
14	-50.6	-52.1	-54.8	-52.5	-35.3	-36.8	-35.1	-35.7333	-17.7	-17.1	-18.3	-17.7	6.1	4.7	3.1	4.63333	17.8	18.8	17.6	18.0667
14.5	-46.3	-50.6	-51.4	-49.4333	-35.7	-35.1	-34.3	-35.0333	-16.3	-15.3	-17.5	-16.3667	6.3	4.8	3.4	4.83333	18.2	18.9	17.9	18.3333
15	-42.5	-48.3	-49.3	-46.7	-33.5	-34.2	-32.8	-33.5	-16.6	-16.8	-17.5	-16.9667	6.4	5.4	3.5	5.1	18.2	19.1	18.1	18.4667
15.5	-41.8	-47.7	-48.5	-46	-32.9	-31.7	-31.5	-32.0333	-16.3	-15.5	-16.9	-16.2333	6.7	5.9	3.9	5.5	18.4	19.2	18.2	18.6
16	-39	-45.5	-47	-43.8333	-30.2	-30.6	-31.4	-30.7333	-15.9	-15.4	-15.2	-15.5	6.9	6.4	4.2	5.83333	18.3	19.2	18.4	18.6333
16.5	-37.3	-42.2	-45.7	-41.7333	-29.1	-28.8	-29.6	-29.1667	-14.7	-14.6	-15.1	-14.8	7.1	6.6	4.1	5.93333	18.4	19.4	18.5	18.7667
17	-35.7	-39.8	-41.1	-38.8667	-28.8	-27.2	-28.7	-28.2333	-14.2	-13.7	-14.8	-14.2333	7.3	6.7	4.8	6.26667	18.6	19.4	18.5	18.8333
17.5	-33.1	-38.4	-39.5	-37	-27.7	-26.9	-26.7	-27.1	-14.4	-13.7	-14.7	-14.2667	7.6	7.1	5.7	6.8	18.8	19.4	18.7	18.9667
18	-32.5	-37.6	-38.6	-36.2333	-26.5	-24.7	-25.5	-25.5667	-13.8	-12.5	-13.5	-13.2667	7.9	7.5	5.5	6.96667	19	19.5	18.8	19.1
18.5	-30.9	-35.3	-36.7	-34.3	-25.9	-24.4	-23.8	-24.7	-12.2	-11.8	-12.9	-12.3	8.2	7.6	5.9	7.23333	19.2	19.6	18.8	19.2
19	-28.3	-34.5	-35.2	-32.6667	-24.7	-23.1	-22.6	-23.4667	-12.5	-11.6	-12.7	-12.2667	8.5	7.8	5.7	7.33333	19.7	19.7	19	19.4667
19.5	-28	-32.7	-33.9	-31.5333	-23.4	-22.6	-21.3	-22.4333	-11.1	-11.3	-11.4	-11.2667	8.8	8.3	6.4	7.83333	19.6	19.8	19.2	19.5333
20	-25.5	-30.9	-31.4	-29.2667	-22.8	-20.4	-20.9	-21.3667	-11.9	-10.9	-11.8	-11.5333	9.2	8.9	6.8	8.3	19.8	19.8	19.2	19.6
20.5	-25.6	-29.4	-29	-28	-21.2	-19.9	-18.5	-19.8667	-11.4	-10.5	-10.2	-10.7	9.5	8.5	6.2	8.06667	19.6	20	19.5	19.7
21	-23.8	-27.1	-28.8	-26.5667	-20.6	-19.1	-17.8	-19.1667	-10.5	-9.8	-10.6	-10.3	9.8	9.8	6.6	8.73333	19.6	20.1	19.7	19.8
21.5	-22.1	-26.3	-26.5	-24.9667	-19.3	-17.2	-16.6	-17.7	-9.7	-9.6	-9.3	-9.53333	10.1	9.6	7.3	9	19.7	20	19.7	19.8
22	-20.2	-25.8	-24.9	-23.6333	-18.5	-16.9	-15.2	-16.8667	-8.2	-9.2	-8.5	-8.63333	10.4	9.2	7.5	9.03333	19.8	20.1	19.8	19.9
22.5	-19.7	-24.5	-23.3	-22.5	-17.2	-16.3	-14.7	-16.0667	-8.2	-8.7	-8.9	-8.6	10.7	9.7	7.9	9.43333	20	20.1	20.1	20.0667
23	-18.6	-22.4	-22.8	-21.2667	-16.8	-15.9	-14.4	-15.7	-7.5	-8.4	-7.8	-7.9	11	10.4	7.8	9.73333	20.1	20.2	20.1	20.1333
23.5	-17.8	-21.6	-21.3	-20.2333	-16.3	-14.2	-13.9	-14.8	-7.1	-7.9	-6.3	-7.1	11.2	10.7	8.3	10.0667	20.3	20.2	20	20.1667
24	-16.2	-20.7	-19.1	-18.6667	-15.3	-13.6	-12.5	-13.8	-6.8	-7.5	-6.5	-6.93333	11.5	10.5	8.5	10.1667	20.3	20.2	20.3	20.2667
24.5	-15.9	-19.7	-18.2	-17.9333	-14.7	-14.4	-11.2	-13.4333	-5.2	-6.2	-5.7	-5.7	11.8	11.2	8.7	10.5667	20.4	20.3	20.3	20.3333
25	-14.7	-17.5	-16.4	-16.2	-13.5	-12.8	-10.4	-12.2333	-4.9	-5.4	-4.5	-4.93333	12	11.4	8.5	10.6333	20.4	20.3	20.3	20.3333
25.5	-12.4	-16.8	-14.2	-14.4667	-12.7	-11.3	-10.7	-11.5667	-4.5	-4.7	-3.7	-4.3	12.3	11.7	9.7	11.2333	20.6	20.4	20.4	20.4667
26	-12.1	-15.6	-14.1	-13.9333	-12.5	-10.6	-9.9	-11	-2.2	-3.9	-3.5	-3.2	12.6	11.9	9.5	11.3333	20.6	20.4	20.4	20.4667
26.5	-10.6	-14.3	-12	-12.3	-11.3	-10	-9.3	-10.2	-1.6	-2.3	-2.3	-2.06667	12.9	12.3	10.3	11.8333	20.6	20.5	20.5	20.5333
27	-9.4	-12.9	-11.5	-11.2667	-10.7	-9.5	-8.1	-9.43333	-1.1	-2.1	-1.7	-1.63333	13.2	12.1	10.4	11.9	20.5	20.6	20.6	20.5667
27.5	-8.9	-11.5	-10.4	-10.2667	-9.4	-8.7	-7.5	-8.53333	-0.3	-1.5	-1.4	-1.06667	13.4	12.5	10.7	12.2	20.7	20.5	20.5	20.5667
28	-7	-10.8	-9.8	-9.2	-9.6	-7.2	-6	-7.6	0.9	-1	0.6	0.166667	13.5	13	11.2	12.5667	20.7	20.6	20.5	20.6
28.5	-7.2	-9.6	-9.1	-8.63333	-8.2	-7.6	-6.4	-7.4	1.4	0.4	0.2	0.666667	13.7	13.4	11.6	12.9	20.7	20.7	20.6	20.6667
29	-6.9	-9.2	-8.3	-8.13333	-7.7	-7.3	-5.9	-6.96667	2.2	0.9	1.7	1.6	13.7	13.9	11.7	13.1	20.8	20.5	20.7	20.6667
29.5	-6.3	-8.7	-8.9	-7.96667	-7.5	-6.8	-4	-6.1	3.6	1	2.5	2.36667	13.9	14	11.5	13.1333	20.8	20.6	20.7	20.7
30	-5.9	-7.4	-8.1	-7.13333	-6.2	-5.2	-3.7	-5.03333	4.3	1.7	2.2	2.73333	14	14.2	12.2	13.4667	20.9	20.6	20.8	20.7667
30.5	-5.2	-7.9	-7.6	-6.9	-6.5	-4.7	-3.2	-4.8	4.8	2.2	3.5	3.5	14.2	14.7	12.5	13.8	20.9	20.5	20.7	20.7
31	-4.6	-6.5	-7.3	-6.13333	-5.4	-3.4	-2.1	-3.63333	5.2	3.1	4.4	4.23333	14.3	13.8	12.4	13.5	20.9	20.6	20.6	20.7
31.5	-4.4	-6.2	-6.1	-5.56667	-4.9	-3.2	-1.5	-3.2	6	3.5	4.9	4.8	14.4	14.5	12.9	13.9333	21	20.5	20.7	20.7333
32	-3.8	-5.4	-5.3	-4.83333	-4.4	-2.4	-0.9	-2.56667	7.3	4.9	5.4	5.86667	14.6	14.9	13.4	14.3	21	20.5	20.8	20.7667
32.5	-3.3	-5.7	-5.5	-4.83333	-3.8	-2.8	-0.6	-2.4	7.7	5.6	6.8	6.7	14.7	15.3	13.5	14.5	21.2	20.6	20.8	20.8667
33	-3.6	-4.9	-4.1	-4.2	-2.5	-1.5	1.3	-0.9	8.2	5.3	6.5	6.66667	14.9	15.3	13.7	14.6333	21.2	20.6	20.9	20.9
33.5	-2	-4.3	-4.9	-3.73333	-2.1	-0.3	2.7	0.1	9.5	6.7	7.1	7.76667	15	15.7	14.1	14.9333	21.3	20.6	20.8	20.9
34	-2.5	-3.1	-3.4	-3	-1.5	-0.8	3.4	0.366667	9.8	6.4	8.5	8.23333	15.3	16.4	14.5	15.4	21.3	20.6	20.8	20.9
34.5	-1.7	-3.5	-2.2	-2.46667	0.4	1.2	3.5	1.7	10.1	7.5	8.4	8.66667	15.4	16.5	14.4	15.4333	21.4	20.7	20.9	21
35	-1.2	-2	-2.6	-1.93333	0.3	1.7	4.1	2.03333	10.7	8.1	9.3	9.36667	15.6	17.1	14.8	15.8333	21.5	20.7	20.9	21.0333

## Sheet: 4Unilateral cooling (average)
Unilateral cooling method-the lower clamp (average)
Time (minutes)	Average temperature of the fixed jaw plate (°C)	Average temperature of the clamp jaws (°C)	Average temperature of movable jaw plate (°C)	Average temperature of the tendon at 1cm proximity to the clamp jaws (°C)	Average temperature of the tendon at 2cm proximity to the clamp jaws (°C)
0	24.0667	24.1667	24.2333	26	26.4
0.5	5.1	18.5667	22.8667	22.3	23.4
1	3.33333	13.9	20.5667	15.4	21.5
1.5	2.76667	12.4333	18.1667	13.4333	19.4333
2	3.06667	11.4667	16.3	14.4333	19.6667
2.5	-14.3667	8.73333	14.7	7.26667	16.5333
3	-14.2	1.86667	10.9333	6.36667	17.2
3.5	-15.2667	-3.86667	9.2	8.16667	17.6333
4	-15.8667	-5.83333	7.16667	9.9	18.6667
4.5	-14.8667	-7.5	5.93333	11.5667	19.2333
5	-16	-8.3	4.56667	12.2333	19.5
5.5	-36.2667	-9.73333	3.5	7.46667	16.4333
6	-41.9333	-13.6667	-0.0333333	1.3	15.2667
6.5	-38.5667	-17.4	-2.56667	3.4	16.8333
7	-57.9	-21.4	-4.46667	1.43333	16
7.5	-53.0667	-26.5667	-7.3	-1.13333	14.6
8	-51.7	-30	-9.46667	4.36667	16.4667
8.5	-50.3667	-32	-10.8667	6.4	17.2
9	-67.3	-35	-12.2333	3.16667	16.3
9.5	-70.4667	-38.5667	-14.9	0.166667	14
10	-69.0333	-40.7	-17.0333	1.36667	14.8667
10.5	-64.4667	-40.8	-18.5	3.06667	16.1
11	-61.1333	-39.1667	-19.8667	3.1	16.3667
11.5	-59.2333	-39.8333	-21.2	3.56667	16.7667
12	-58.2	-38.7667	-19.9667	3.76667	17.0333
12.5	-57.3333	-38.2333	-19.9667	4.03333	17.3333
13	-57.0667	-36.9667	-18.2667	4.3	17.4667
13.5	-54.1	-37	-19.0667	4.33333	17.7667
14	-52.5	-35.7333	-17.7	4.63333	18.0667
14.5	-49.4333	-35.0333	-16.3667	4.83333	18.3333
15	-46.7	-33.5	-16.9667	5.1	18.4667
15.5	-46	-32.0333	-16.2333	5.5	18.6
16	-43.8333	-30.7333	-15.5	5.83333	18.6333
16.5	-41.7333	-29.1667	-14.8	5.93333	18.7667
17	-38.8667	-28.2333	-14.2333	6.26667	18.8333
17.5	-37	-27.1	-14.2667	6.8	18.9667
18	-36.2333	-25.5667	-13.2667	6.96667	19.1
18.5	-34.3	-24.7	-12.3	7.23333	19.2
19	-32.6667	-23.4667	-12.2667	7.33333	19.4667
19.5	-31.5333	-22.4333	-11.2667	7.83333	19.5333
20	-29.2667	-21.3667	-11.5333	8.3	19.6
20.5	-28	-19.8667	-10.7	8.06667	19.7
21	-26.5667	-19.1667	-10.3	8.73333	19.8
21.5	-24.9667	-17.7	-9.53333	9	19.8
22	-23.6333	-16.8667	-8.63333	9.03333	19.9
22.5	-22.5	-16.0667	-8.6	9.43333	20.0667
23	-21.2667	-15.7	-7.9	9.73333	20.1333
23.5	-20.2333	-14.8	-7.1	10.0667	20.1667
24	-18.6667	-13.8	-6.93333	10.1667	20.2667
24.5	-17.9333	-13.4333	-5.7	10.5667	20.3333
25	-16.2	-12.2333	-4.93333	10.6333	20.3333
25.5	-14.4667	-11.5667	-4.3	11.2333	20.4667
26	-13.9333	-11	-3.2	11.3333	20.4667
26.5	-12.3	-10.2	-2.06667	11.8333	20.5333
27	-11.2667	-9.43333	-1.63333	11.9	20.5667
27.5	-10.2667	-8.53333	-1.06667	12.2	20.5667
28	-9.2	-7.6	0.166667	12.5667	20.6
28.5	-8.63333	-7.4	0.666667	12.9	20.6667
29	-8.13333	-6.96667	1.6	13.1	20.6667
29.5	-7.96667	-6.1	2.36667	13.1333	20.7
30	-7.13333	-5.03333	2.73333	13.4667	20.7667
30.5	-6.9	-4.8	3.5	13.8	20.7
31	-6.13333	-3.63333	4.23333	13.5	20.7
31.5	-5.56667	-3.2	4.8	13.9333	20.7333
32	-4.83333	-2.56667	5.86667	14.3	20.7667
32.5	-4.83333	-2.4	6.7	14.5	20.8667
33	-4.2	-0.9	6.66667	14.6333	20.9
33.5	-3.73333	0.1	7.76667	14.9333	20.9
34	-3	0.366667	8.23333	15.4	20.9
34.5	-2.46667	1.7	8.66667	15.4333	21
35	-1.93333	2.03333	9.36667	15.8333	21.0333

## Sheet: fitted equation(1+2)
Quenching method-the upper clamp (fitted equation)									Quenching method-the lower clamp (fitted equation)
Time (minutes)	Average temperature of the fixed jaw plate (°C)	Average temperature of the clamp jaws (°C)	Average temperature of movable jaw plate (°C)	Average temperature of the tendon at 1cm proximity to the clamp jaws (°C)	Average temperature of the tendon at 2cm proximity to the clamp jaws (°C)				Time (minutes)	Average temperature of the fixed jaw plate (°C)	Average temperature of the clamp jaws (°C)	Average temperature of movable jaw plate (°C)	Average temperature of the tendon at 1cm proximity to the clamp jaws (°C)	Average temperature of the tendon at 2cm proximity to the clamp jaws (°C)
0	23.9	24.0667	24.3	26.0333	26.1667				0	24	24.2	24.2333	26.1667	26.4		Quenching method-the upper clamp
0.5	12.8	14.2333	14.4667	11.6333	15.9				0.5	14.0667	15.1667	15.5667	12.5333	14.7
1	-19.6333	-12.9333	-14.4333	-13.6	-8.4				1	-18.0667	-13.8667	-16.0333	-12.1333	-9.26667
1.5	-174.867	-26.2667	-21.2667	-138.267	-85.7333				1.5	-172.967	-24	-22.4	-135.767	-74
2	-50.2	-45.9667	-41.9333	-46.9333	-43.2				2	-49.8	-43.3667	-43.3333	-45.5	-41.4667
2.5	-49.4333	-43.8333	-40.9667	-45.0667	-40.4333				2.5	-48.8	-43.0667	-43.1	-43.9333	-39.7667
3	-47.6333	-43.8	-39.2	-42.5667	-37.3667				3	-47.1	-41.2333	-41.6333	-42.6	-38.0667
3.5	-46.7667	-42.8333	-38.1	-40.5333	-34.5				3.5	-46.8333	-40.9	-40.5333	-40.5333	-36
4	-45.5	-42.0333	-35.9667	-38.9	-31.7333				4	-45.0333	-39.3667	-38.9	-38.7667	-34.0667
4.5	-43.9333	-41.2	-35.1	-36.6333	-29.6667				4.5	-44.2333	-38.8	-36.9	-36.4	-32.2
5	-42.9333	-40.8	-33.7	-34.9667	-27.9667				5	-42.7667	-37.5333	-36.1667	-35	-31.1667
5.5	-41.9667	-39.8	-32.5	-33.2333	-25.6667				5.5	-42.3333	-36.9333	-35.4333	-33.3	-29.4
6	-40.3	-38.5333	-31.0667	-31.0667	-23.4				6	-41.5	-36.1	-34.5333	-31.9	-28.7333
6.5	-39.6667	-37.9667	-30.0333	-28.9	-22.0333				6.5	-40.7	-35.0333	-33	-30.8	-26.5
7	-39	-36.9333	-29.3667	-27.6667	-20.2667				7	-39.8667	-33.9	-32.2667	-29.3667	-25.6333
7.5	-37.7	-35.7	-27.8333	-26.2667	-17.9				7.5	-38.6333	-32.6333	-31.1667	-27.7667	-24.2
8	-36.1333	-34.6	-27.3333	-24.4667	-17.4333				8	-38.3	-32.0667	-30.2	-25.6	-22.3667
8.5	-35.6667	-33.9333	-26.1333	-23.3333	-16.4333				8.5	-37.7	-31.3333	-29.2	-24.7333	-20.7667
9	-34.2667	-32.5667	-24.8333	-21.6333	-14.8333				9	-35.8	-29.9667	-28.7667	-23.0333	-19.2667
9.5	-33.8	-32.5333	-23.8	-19.8667	-14				9.5	-35.1333	-29.7	-27.3667	-21.6333	-18.1
10	-32.7333	-31.6333	-23.5333	-19.3333	-12.4				10	-34	-29.3333	-26.2	-20.6	-16.6333
10.5	-31.3667	-30.5	-22.7333	-18.5	-10.5333				10.5	-31.1	-28.5	-25.2333	-19.9	-15.6667
11	-30.6	-29.3667	-21.7	-17.7333	-9.53333				11	-30.0333	-27.3667	-24.4	-18.2667	-15.3667
11.5	-29.4667	-28.2	-20.8	-16.2667	-8.96667				11.5	-28.0333	-26.1333	-22.8333	-17.3	-14.9
12	-28.4333	-28.2	-20.5667	-15.6667	-8				12	-27.0333	-25.7	-23	-15.6333	-13.9
12.5	-27.8667	-27.4333	-18.7667	-14.7667	-7.16667				12.5	-25.8	-25.1	-21.3667	-15.0667	-12.6667
13	-26.9667	-26.4667	-18.1333	-14.1333	-6.46667				13	-24.5333	-24.1	-20.6667	-14.3667	-11.9667		Quenching method-the lower clamp
13.5	-26	-25.3667	-17.1333	-13.5	-6				13.5	-23.3667	-23.5667	-19.1333	-13.4333	-11.0667
14	-25.4	-24.3333	-16.2667	-12.6333	-5.53333				14	-21.8333	-22.9	-18.1667	-13	-10.5
14.5	-23.8333	-23.6333	-15.3	-11.7333	-4.8				14.5	-21.6	-22.4667	-17.3667	-11.6	-9.3
15	-23.4333	-22.4333	-14.9667	-11.3	-3.96667				15	-20	-21.2667	-16.3333	-11	-8.26667
15.5	-22.7	-21.8	-14.3667	-10.8667	-3.4				15.5	-19.0333	-20.9333	-15.8	-10.4667	-7.83333
16	-21.6333	-21.1	-13.5	-10.2333	-2.83333				16	-18.4	-20.1333	-14.6667	-9.43333	-6.96667
16.5	-20.6667	-20.0333	-13.2333	-9.73333	-2.36667				16.5	-17.6667	-19.2333	-14.3333	-9	-6.06667
17	-19.7333	-18.6	-12.4333	-9.5	-1.76667				17	-17	-18.3	-13.6667	-8.16667	-5.5
17.5	-18.5667	-17.6667	-11.6667	-9	-1.4				17.5	-16.2	-17.6	-13.1333	-7.66667	-4.96667
18	-17.5667	-16.9333	-11.3	-8.5	-0.866667				18	-15.5	-16.9667	-12.0667	-7.3	-4.03333
18.5	-16.8	-15.8667	-10.7333	-8.13333	-0.5				18.5	-14.4	-15.9	-11.4	-6.53333	-3.5
19	-15.4333	-15.1	-10.1	-7.53333	0.266667				19	-14.0667	-15.3	-10.6667	-6.3	-3.03333
19.5	-15.2667	-14.2333	-9.7	-7.23333	0.666667				19.5	-13.6333	-14.5333	-9.9	-5.96667	-2.03333
20	-14.3333	-13.7	-9.16667	-6.83333	1.26667				20	-12.8667	-13.5333	-9.33333	-5.56667	-1.33333
20.5	-12.9667	-12.5	-8.76667	-6.43333	1.63333				20.5	-11.6333	-13	-8.36667	-5.1	-0.666667
21	-12.8667	-10.9333	-8.06667	-5.86667	2.36667				21	-10.9333	-12.6	-7.66667	-4.76667	0
21.5	-12.0667	-10.9333	-7.36667	-5.46667	3.16667				21.5	-10	-11.4667	-7.03333	-4.3	0.833333
22	-11.5333	-10.4	-6.86667	-5.03333	3.73333				22	-9.9	-11.2	-6.3	-4.1	1.56667
22.5	-10.4333	-9.56667	-6.4	-4.56667	4.16667				22.5	-9.23333	-10.1667	-5.8	-3.66667	2
23	-10.4667	-9.33333	-6.2	-4.2	4.86667				23	-8.36667	-9.86667	-5.5	-3.03333	2.4
23.5	-9.1	-8.3	-5.63333	-3.8	5.26667				23.5	-8.23333	-8.7	-4.9	-2.13333	2.83333
24	-8.5	-8.2	-5.1	-3.7	5.76667				24	-7.2	-8.43333	-4.6	-1.53333	3.63333
24.5	-8.13333	-7.4	-4.9	-3.36667	6.6				24.5	-6.36667	-7.5	-4.1	-1.2	4.3
25	-7.16667	-6.8	-4.46667	-2.86667	6.96667				25	-5.93333	-7.03333	-3.73333	-0.566667	4.83333
25.5	-6.6	-6.03333	-4.16667	-2.43333	7.46667				25.5	-5.6	-6.53333	-3.3	-0.1	4.96667
26	-5.73333	-5.76667	-3.73333	-1.73333	8				26	-5.26667	-6.1	-2.4	0.2	5.86667
26.5	-5.26667	-4.86667	-3.23333	-1.46667	8.8				26.5	-5	-5.33333	-2.06667	0.633333	6.36667
27	-4.8	-4.43333	-2.76667	-1.06667	9.03333				27	-4.5	-4.96667	-1.43333	1.13333	7.03333
27.5	-4.16667	-3.9	-2.23333	-0.666667	9.6				27.5	-3.83333	-4.6	-0.666667	1.66667	7.26667
28	-3.9	-3.26667	-1.5	-0.3	9.96667				28	-3.43333	-4.56667	-0.333333	2.4	8.23333
28.5	-2.8	-3.1	-1.03333	0.466667	10.3				28.5	-2.9	-4.2	0.666667	2.86667	8.63333
29	-2.66667	-2.23333	-0.4	0.933333	10.7333				29	-2.53333	-3.6	1.06667	3.23333	9.2
29.5	-2.23333	-1.66667	0.133333	1.16667	10.9667				29.5	-2.16667	-3.2	2.06667	3.63333	9.73333		combined comparison (Quenching method-the upper and lower clamps)
30	-1.93333	-1.16667	0.6	1.4	11.4				30	-1.83333	-2.86667	2.5	4.06667	10.2
30.5	-1.46667	-0.6	1	1.9	11.7667				30.5	-1.56667	-2.3	3.16667	4.46667	10.6
31	-1.06667	0.166667	1.66667	2.56667	12.2667				31	-1.43333	-1.6	3.7	4.9	11.1333
31.5	-0.566667	0.3	2.03333	2.96667	12.5667				31.5	-0.3	-1.33333	4.2	5.26667	11.6
32	-0.0666667	1.13333	2.46667	3.53333	12.8667				32	0.0666667	-0.633333	4.96667	5.7	12.2667
32.5	0.6	1.66667	2.7	3.8	13.4				32.5	0.166667	-0.3	5.23333	6.16667	12.6
33	0.966667	1.93333	3.03333	4.43333	13.6667				33	0.5	0.2	5.46667	6.46667	13.0667
33.5	1.23333	2.26667	3.26667	5.16667	14				33.5	0.9	0.566667	5.83333	6.7	13.7
34	1.43333	2.56667	3.46667	5.8	14.5				34	0.933333	0.966667	6.56667	7	14.0667
34.5	1.93333	2.96667	3.86667	6.23333	14.7667				34.5	1.26667	1.3	6.9	7.06667	14.1
35	2.3	3.33333	4.3	6.66667	15.2				35	1.83333	2.2	7.5	7.33333	14.6
Average temperature of the fixed jaw plate (fitted equatione)	the lower clamp	0-1.5min	Model	ExpGrow1	1.5-2min	Equation	y = a + b*x	2-35min	Model	Logistic
			Equation	y = y0 + A1*exp((x-x0)/t1)		Plot	Average temperature of the fixed jaw plate (the lower clamp)		Equation	y = A2 + (A1-A2)/(1 + (x/x0)^p)
			Plot	Average temperature of the fixed jaw plate (the lower clamp)		y0	unweighted		Plot	Average temperature of the fixed jaw plate (the lower clamp)
			y0	27.23531 ± 0		x0	-542.6 ± --		y0	-49.72769 ± 0.42921
			x0	0 ± 0		A1	246.4 ± --		x0	12.74379 ± 1.11985
			A1	-3.23531 ± 0		t1	0		A1	16.24558 ± 0.28632
			t1	0.3636 ± 0		Reduced Chi-Square	1		t1	1.95854 ± 0.0618
			Reduced Chi-Square	0		R-Squared	1		Reduced Chi-Square	0.39767
			R-Squared	0.99889		Adjusted R-Squared	--		R-Squared	0.99852
			Adjusted R-Squared	0					Adjusted R-Squared	0.99845
	the upper clamp	0-1.5min	Model	ExpGrow1	1.5-2min	Equation	y = a + b*x	2-35min	Model	Logistic						Quenching method (fitted equation)
			Equation	y = y0 + A1*exp((x-x0)/t1) y = 27.78-3.87*e(x/0.38)		Plot	Average temperature of the fixed jaw plate (the upper clamp)		Equation	y = A2 + (A1-A2)/(1 + (x/x0)^p)
			Plot	Average temperature of the fixed jaw plate (the upper clamp)		y0	unweighted		Plot	Average temperature of the fixed jaw plate (the upper clamp)
			y0	27.77278 ± 0		x0	-549		y0	-50.77786 ± 0.52541
			x0	0 ± 0		A1	249.4 ± --		x0	34.33138 ± 2.82696
			A1	-3.87278		t1	0		A1	24.42779 ± 0.98293
			t1	0.37902 ± 0		Reduced Chi-Square	1		t1	1.4643 ± 0.05105
			Reduced Chi-Square	0		R-Squared	1		Reduced Chi-Square	0.15231
			R-Squared	0.99817		Adjusted R-Squared	--		R-Squared	0.99936
			Adjusted R-Squared	0					Adjusted R-Squared	0.99933
Average temperature of movable jaw plate (fitted equatione)	the upper clamp	0-2min	Model	ExpGrow1	2-35min	Model	Logistic
			Equation	y = y0 + A1*exp((x-x0)/t1)		Equation	y = A2 + (A1-A2)/(1 + (x/x0)^p)
			Plot	Average temperature of movable jaw plate (the upper clamp)		Plot	Average temperature of movable jaw plate (the upper clamp)
			y0	21487.59688 ± 8076560.17556		y0	-52.13624 ± 1.34163
			x0	-695.95004 ± --		x0	74.82132 ± 12.58923
			A1	-7221.90407 ± --		A1	46.50998 ± 9.94413
			t1	638.98298 ± 240088.39097		t1	0.79304 ± 0.05624
			Reduced Chi-Square	87.1939		Reduced Chi-Square	0.12269
			R-Squared	0.9701		R-Squared	0.99931
			Adjusted R-Squared	0.88041		Adjusted R-Squared	0.99928
	the lower clamp	0-2min	Model	ExpGrow1	2-35min	Model	Logistic
			Equation	y = y0 + A1*exp((x-x0)/t1)		Equation	y = A2 + (A1-A2)/(1 + (x/x0)^p)
			Plot	Average temperature of movable jaw plate (the lower clamp)		Plot	Average temperature of movable jaw plate (the lower clamp)
			y0	14368.50865 ± 4003562.46305		y0	-48.57833 ± 0.72837
			x0	-468.73987 ± 8236407.62164		x0	65.89739 ± 7.79847
			A1	-4641.92519 ± 9.20421E7		A1	36.71047 ± 4.10102
			t1	415.51833 ± 115710.32336		t1	1.07803 ± 0.05192
			Reduced Chi-Square	117.642		Reduced Chi-Square	0.17693
			R-Squared	0.96218		R-Squared	0.99924
			Adjusted R-Squared	0.84872		Adjusted R-Squared	0.9992
Average temperature of the clamp jaws (fitted equatione)	the upper clamp	0-2min	Model	ExpGrow1	2-35min	Model	Logistic
			Equation	y = y0 + A1*exp((x-x0)/t1)		Equation	y = A2 + (A1-A2)/(1 + (x/x0)^p)
			Plot	Average temperature of the clamp jaws (the upper clamp)		Plot	Average temperature of the clamp jaws (the upper clamp)
			y0	404.52813 ± 1963.21707		y0	-46.10362 ± 0.33551
			x0	-15.50232 ± --		x0	32.39355 ± 2.46034
			A1	-97.67316 ± --		A1	24.93349 ± 0.91439
			t1	11.44319 ± 54.31177		t1	1.61123 ± 0.04795
			Reduced Chi-Square	49.0512		Reduced Chi-Square	0.18147
			R-Squared	0.98521		R-Squared	0.99924
			Adjusted R-Squared	0.94084		Adjusted R-Squared	0.9992
	the lower clamp	0-2min	Model	ExpGrow1	2-35min	Model	Logistic
			Equation	y = y0 + A1*exp((x-x0)/t1)		Equation	y = A2 + (A1-A2)/(1 + (x/x0)^p)
			Plot	Average temperature of the clamp jaws (the lower clamp)		Plot	Average temperature of the clamp jaws (the lower clamp)
			y0	1257.49893 ± 24642.32059		y0	-45.80815 ± 0.52937
			x0	-42.17382 ± --		x0	48.64481 ± 6.28091
			A1	-385.14544 ± --		A1	34.23687 ± 3.28882
			t1	36.28933 ± 706.47461		t1	1.24378 ± 0.05721
			Reduced Chi-Square	76.5758		Reduced Chi-Square	0.17919
			R-Squared	0.97544		R-Squared	0.99905
			Adjusted R-Squared	0.90177		Adjusted R-Squared	0.999
Average temperature of the tendon at 1cm proximity to the clamp jaws (fitted equatione)	the upper clamp	0-1.5min	Model	ExpGrow1	1.5-2min	Equation	y = a + b*x			2-35min	Model	Logistic
			Equation	y = y0 + A1*exp((x-x0)/t1)		Plot	Average temperature of the tendon at 1cm proximity to the clamp jaws (the upper clamp)				Equation	y = A2 + (A1-A2)/(1 + (x/x0)^p)
			Plot	Average temperature of the tendon at 1cm proximity to the clamp jaws (the upper clamp)		y0	unweighted				Plot	Average temperature of the tendon at 1cm proximity to the clamp jaws (the upper clamp)
			y0	32.71069 ± 0		x0	-412.5 ± --				y0	-78.65824 ± 11.41839
			x0	0 ± 0		A1	182.8 ± --				x0	53.98894 ± 18.55823
			A1	-6.71069 ± 0		t1	0				A1	14.80572 ± 3.14521
			t1	0.46325 ± 0		Reduced Chi-Square	1				t1	0.61389 ± 0.14348
			Reduced Chi-Square	0		R-Squared	1				Reduced Chi-Square	0.7608
			R-Squared	0.99163		Adjusted R-Squared	--				R-Squared	0.99626
			Adjusted R-Squared	0							Adjusted R-Squared	0.99608
	the lower clamp	0-1.5min	Model	ExpGrow1	1.5-2min	Equation	y = a + b*x			2-35min	Model	Logistic
			Equation	y = y0 + A1*exp((x-x0)/t1)		Plot	Average temperature of the tendon at 1cm proximity to the clamp jaws (the lower clamp)				Equation	y = A2 + (A1-A2)/(1 + (x/x0)^p)
			Plot	Average temperature of the tendon at 1cm proximity to the clamp jaws (the lower clamp)		y0	unweighted				Plot	Average temperature of the tendon at 1cm proximity to the clamp jaws (the lower clamp)
			y0	32.39942 ± 0		x0	-406.7 ± --				y0	-56.88537 ± 1.88937
			x0	0 ± 0		A1	180.6 ± --				x0	35.17183 ± 4.06972
			A1	-6.19942 ± 0		t1	0				A1	15.55173 ± 0.91841
			t1	0.45445 ± 0		Reduced Chi-Square	1				t1	1.00911 ± 0.07047
			Reduced Chi-Square	0		R-Squared	1				Reduced Chi-Square	0.3851
			R-Squared	0.9919		Adjusted R-Squared	--				R-Squared	0.99833
			Adjusted R-Squared	0							Adjusted R-Squared	0.99825
Average temperature of the tendon at 2cm proximity to the clamp jaws (fitted equatione)	the upper clamp	0-1.5min	Model	ExpGrow1	1.5-2min	Equation	y = a + b*x			2-35min	Model	Logistic
			Equation	y = y0 + A1*exp((x-x0)/t1)		Plot	Average temperature of the tendon at 2cm proximity to the clamp jaws (the upper clamp)				Equation	y = A2 + (A1-A2)/(1 + (x/x0)^p)
			Plot	Average temperature of the tendon at 2cm proximity to the clamp jaws (the upper clamp)		y0	unweighted				Plot	Average temperature of the tendon at 2cm proximity to the clamp jaws (the upper clamp)
			y0	31.92099 ± 0		x0	-213.2 ± --				y0	-157.01294 ± 115.84276
			x0	0 ± 0		A1	85 ± --				x0	340.83783 ± 700.14592
			A1	-5.72099 ± 0		t1	0				A1	789.31436 ± 8501.54976
			t1	0.49614 ± 0		Reduced Chi-Square	1				t1	0.20551 ± 0.23687
			Reduced Chi-Square	0		R-Squared	1				Reduced Chi-Square	0.324
			R-Squared	0.99909		Adjusted R-Squared	--				R-Squared	0.99865
			Adjusted R-Squared	0							Adjusted R-Squared	0.99858
	the lower clamp	0-1.5min	Model	ExpGrow1	1.5-2min	Equation	y = a + b*x			2-35min	Model	Logistic
			Equation	y = y0 + A1*exp((x-x0)/t1)		Plot	Average temperature of the tendon at 2cm proximity to the clamp jaws (the lower clamp)				Equation	y = A2 + (A1-A2)/(1 + (x/x0)^p)
			Plot	Average temperature of the tendon at 2cm proximity to the clamp jaws (the lower clamp)		y0	unweighted				Plot	Average temperature of the tendon at 2cm proximity to the clamp jaws (the lower clamp)
			y0	34.76386 ± 0		x0	-171.5 ± --				y0	-58.03375 ± 2.13043
			x0	0 ± 0		A1	65 ± --				x0	126.89515 ± 23.92597
			A1	-8.36386 ± 0		t1	0				A1	66.52237 ± 21.55579
			t1	0.58474 ± 0		Reduced Chi-Square	1				t1	0.67627 ± 0.05595
			Reduced Chi-Square	0		R-Squared	1				Reduced Chi-Square	0.14188
			R-Squared	0.99918		Adjusted R-Squared	--				R-Squared	0.99945
			Adjusted R-Squared	0							Adjusted R-Squared	0.99942

## Sheet: fitted equation(3+4)
Unilateral cooling method-the upper clamp (fitted equatione)										Unilateral cooling method-the lower clamp (fitted equation)
Time (minutes)	Average temperature of the fixed jaw plate (°C)	Average temperature of the clamp jaws (°C)	Average temperature of movable jaw plate (°C)	Average temperature of the tendon at 1cm proximity to the clamp jaws (°C)	Average temperature of the tendon at 2cm proximity to the clamp jaws (°C)					Time (minutes)	Average temperature of the fixed jaw plate (°C)	Average temperature of the clamp jaws (°C)	Average temperature of movable jaw plate (°C)	Average temperature of the tendon at 1cm proximity to the clamp jaws (°C)	Average temperature of the tendon at 2cm proximity to the clamp jaws (°C)
0	24.2	24.7667	23.9333	26.2	26.2667					0	24.0667	24.1667	24.2333	26	26.4	Unilateral cooling method-the upper clamp							Unilateral cooling method-the upper and lower clamps
0.5	19.1	24.0333	22.8333	23.4333	24.2					0.5	5.1	18.5667	22.8667	22.3	23.4
1	5.8	21.7	20.5667	16	22.2667					1	3.33333	13.9	20.5667	15.4	21.5
1.5	3.96667	18.3667	18.8333	13.2667	18.3					1.5	2.76667	12.4333	18.1667	13.4333	19.4333
2	2.33333	11.8	15.9667	12.3333	20					2	3.06667	11.4667	16.3	14.4333	19.6667
2.5	-0.866667	8.06667	13.3667	10.4	21					2.5	-14.3667	8.73333	14.7	7.26667	16.5333
3	-16.3333	6.6	11.6	6.13333	17.5667					3	-14.2	1.86667	10.9333	6.36667	17.2
3.5	-18.7333	-1.53333	8.86667	6.56667	17.5333					3.5	-15.2667	-3.86667	9.2	8.16667	17.6333
4	-17.4333	-5.5	5.5	7.76667	18.8					4	-15.8667	-5.83333	7.16667	9.9	18.6667
4.5	-16.6	-7.5	4.26667	9.26667	20.3					4.5	-14.8667	-7.5	5.93333	11.5667	19.2333
5	-15.4667	-8.96667	2.56667	11.2667	20.9667					5	-16	-8.3	4.56667	12.2333	19.5
5.5	-14.3	-9.73333	-0.1	9.4	19.3					5.5	-36.2667	-9.73333	3.5	7.46667	16.4333
6	-36.3	-11.3333	-2.16667	3.66667	16.2					6	-41.9333	-13.6667	-0.0333333	1.3	15.2667
6.5	-40.4	-18.0667	-4.23333	-0.2	16.3667					6.5	-38.5667	-17.4	-2.56667	3.4	16.8333
7	-36.3	-19.4	-6.13333	2.2	18.2333					7	-57.9	-21.4	-4.46667	1.43333	16
7.5	-51.4	-25.2333	-7.46667	-1.23333	17.5					7.5	-53.0667	-26.5667	-7.3	-1.13333	14.6
8	-53.3667	-28.6667	-9.36667	-2.56667	14.3333					8	-51.7	-30	-9.46667	4.36667	16.4667
8.5	-50.0333	-30.3333	-10.4667	2.76667	16.6667					8.5	-50.3667	-32	-10.8667	6.4	17.2
9	-48.9667	-33.1	-11.2	5.83333	16.6667					9	-67.3	-35	-12.2333	3.16667	16.3
9.5	-67.4667	-35	-12.7	2.6	15.5667					9.5	-70.4667	-38.5667	-14.9	0.166667	14
10	-69.7	-37.0333	-14.2	-0.9	13.5					10	-69.0333	-40.7	-17.0333	1.36667	14.8667
10.5	-66.1333	-40.8	-15.2	0.733333	14.1					10.5	-64.4667	-40.8	-18.5	3.06667	16.1
11	-59.4667	-40.1667	-16.5667	2.23333	15.2					11	-61.1333	-39.1667	-19.8667	3.1	16.3667
11.5	-57.9	-39.5	-17.5667	2.8	15.7667					11.5	-59.2333	-39.8333	-21.2	3.56667	16.7667
12	-56.8667	-39.7667	-18.7	4	16.1333					12	-58.2	-38.7667	-19.9667	3.76667	17.0333
12.5	-56.5	-38.4667	-19.8333	3.96667	16.4333					12.5	-57.3333	-38.2333	-19.9667	4.03333	17.3333
13	-54.0667	-38	-20.5333	4.53333	16.6333					13	-57.0667	-36.9667	-18.2667	4.3	17.4667
13.5	-52.5333	-37.3	-20.8667	5.03333	16.7333					13.5	-54.1	-37	-19.0667	4.33333	17.7667
14	-51.1667	-36.3333	-19.6333	5.26667	16.6333					14	-52.5	-35.7333	-17.7	4.63333	18.0667
14.5	-50.1	-35.8667	-18.9667	5.56667	16.8667					14.5	-49.4333	-35.0333	-16.3667	4.83333	18.3333
15	-48.6667	-35.1333	-18.6	5.8	17.1					15	-46.7	-33.5	-16.9667	5.1	18.4667	Unilateral cooling method-the lower clamp						Unilateral cooling method-the upper and lower clamps (fitted equatione)
15.5	-47.3333	-33.8667	-18.4	6.26667	17.3					15.5	-46	-32.0333	-16.2333	5.5	18.6
16	-46.3333	-31.7333	-17.3667	6.73333	17.4667					16	-43.8333	-30.7333	-15.5	5.83333	18.6333
16.5	-44.7333	-30.8333	-16.3667	6.7	17.5333					16.5	-41.7333	-29.1667	-14.8	5.93333	18.7667
17	-43.5333	-29.2333	-16.3	7.16667	17.6667					17	-38.8667	-28.2333	-14.2333	6.26667	18.8333
17.5	-42.6667	-28.1	-15.9	7.43333	17.9					17.5	-37	-27.1	-14.2667	6.8	18.9667
18	-41.2333	-26.2333	-15.1667	7.6	18					18	-36.2333	-25.5667	-13.2667	6.96667	19.1
18.5	-40.3	-25.0333	-14.8	7.9	18.0667					18.5	-34.3	-24.7	-12.3	7.23333	19.2
19	-38.6667	-24.1333	-14.2333	8.4	18.2					19	-32.6667	-23.4667	-12.2667	7.33333	19.4667
19.5	-37.5333	-22.4333	-13.6	8.43333	18.3333					19.5	-31.5333	-22.4333	-11.2667	7.83333	19.5333
20	-35.6	-21.7	-13.2667	8.76667	18.4333					20	-29.2667	-21.3667	-11.5333	8.3	19.6
20.5	-34	-20.5333	-12.3	9	18.6					20.5	-28	-19.8667	-10.7	8.06667	19.7
21	-32.9	-19.5	-11.6	9.46667	18.6667					21	-26.5667	-19.1667	-10.3	8.73333	19.8
21.5	-30.6333	-18.3667	-10.6	9.56667	18.8333					21.5	-24.9667	-17.7	-9.53333	9	19.8
22	-29.8667	-17.2	-10.5333	9.76667	18.8667					22	-23.6333	-16.8667	-8.63333	9.03333	19.9
22.5	-28.1667	-16.3	-9.7	10.2	18.9333					22.5	-22.5	-16.0667	-8.6	9.43333	20.0667
23	-27.2667	-15.7	-9.3	10.4333	18.9667					23	-21.2667	-15.7	-7.9	9.73333	20.1333
23.5	-25.9	-14.8	-8.86667	10.5333	19.0667					23.5	-20.2333	-14.8	-7.1	10.0667	20.1667
24	-24.6667	-13.5333	-7.96667	10.9667	19.2					24	-18.6667	-13.8	-6.93333	10.1667	20.2667
24.5	-23.6	-12.7667	-7.26667	11.3667	19.2333					24.5	-17.9333	-13.4333	-5.7	10.5667	20.3333
25	-22.6667	-11.9	-6.9	11.4	19.4					25	-16.2	-12.2333	-4.93333	10.6333	20.3333
25.5	-21.8	-11.2333	-6.1	11.6667	19.4					25.5	-14.4667	-11.5667	-4.3	11.2333	20.4667
26	-20.6	-10.3333	-5.26667	11.9667	19.5					26	-13.9333	-11	-3.2	11.3333	20.4667
26.5	-19.6333	-9.2	-4.36667	12.4	19.5333					26.5	-12.3	-10.2	-2.06667	11.8333	20.5333
27	-19.9333	-8.43333	-4.26667	12.5	19.6333					27	-11.2667	-9.43333	-1.63333	11.9	20.5667
27.5	-18.2667	-7.86667	-3.3	12.9667	19.7333					27.5	-10.2667	-8.53333	-1.06667	12.2	20.5667
28	-17.2	-6.93333	-2.86667	13.2	19.8					28	-9.2	-7.6	0.166667	12.5667	20.6
28.5	-16.0667	-6.36667	-2.06667	13.4	19.8333					28.5	-8.63333	-7.4	0.666667	12.9	20.6667
29	-15.0667	-5.96667	-1.3	13.9667	19.8667					29	-8.13333	-6.96667	1.6	13.1	20.6667
29.5	-14.6333	-4.76667	-0.733333	14.3667	19.9667					29.5	-7.96667	-6.1	2.36667	13.1333	20.7
30	-12.8	-3.7	-0.5	14.6	19.9667					30	-7.13333	-5.03333	2.73333	13.4667	20.7667
30.5	-12.2333	-3.46667	0.533333	15	20.1667					30.5	-6.9	-4.8	3.5	13.8	20.7
31	-10.8	-2.3	1.6	15.0333	19.9667					31	-6.13333	-3.63333	4.23333	13.5	20.7
31.5	-9.56667	-2.2	2.03333	15.3333	20.0667					31.5	-5.56667	-3.2	4.8	13.9333	20.7333
32	-8.5	-1.23333	2.4	15.5667	20.1667					32	-4.83333	-2.56667	5.86667	14.3	20.7667
32.5	-7.83333	-0.2	3.5	15.7667	20.3					32.5	-4.83333	-2.4	6.7	14.5	20.8667
33	-7.53333	1.1	3.56667	16.0333	20.3333					33	-4.2	-0.9	6.66667	14.6333	20.9
33.5	-6.73333	1.7	4.46667	16.2333	20.4333					33.5	-3.73333	0.1	7.76667	14.9333	20.9
34	-6	2.9	5.53333	16.6	20.5667					34	-3	0.366667	8.23333	15.4	20.9
34.5	-5.13333	3.03333	6.03333	16.5667	20.7					34.5	-2.46667	1.7	8.66667	15.4333	21
35	-4.26667	4.03333	6.33333	16.7667	20.8667					35	-1.93333	2.03333	9.36667	15.8333	21.0333
Average temperature of the fixed jaw plate (fitted equatione)	the upper clamp	0-35min	Equation	y = Intercept + B1*x^1 + B2*x^2 + B3*x^3 + B4*x^4 + B5*x^5 + B6*x^6 + B7*x^7 + B8*x^8 + B9*x^9
			Plot	Average temperature of the fixed jaw plate (the upper clamp)
			Weight	unweighted
			Intercept	27.15377 ± 3.35117
			B1	-30.71719 ± 5.91043
			B2	13.90462 ± 3.33457
			B3	-3.69231 ± 0.84086
			B4	0.50123 ± 0.1133
			B5	-0.03805 ± 0.00888
			B6	0.0017 ± 4.17521E-4
			B7	-4.46276E-5 ± 1.1598E-5
			B8	6.36359E-7 ± 1.75335E-7
			B9	-3.81069E-9 ± 1.1115E-9
			Sum of Squared Residuals (SSR)	902.497
			R-squared (Coefficient of Determination)	0.97035
			Adjusted R-squared	0.96598
	the lower clamp	0-35min	Equation	y = Intercept + B1*x^1 + B2*x^2 + B3*x^3 + B4*x^4 + B5*x^5 + B6*x^6 + B7*x^7 + B8*x^8 + B9*x^9
			Plot	Average temperature of the fixed jaw plate (the lower clamp)
			Weight	unweighted
			Intercept	21.572 ± 3.08998
			B1	-28.63694 ± 5.44978
			B2	13.91989 ± 3.07468
			B3	-3.92312 ± 0.77532
			B4	0.551 ± 0.10447
			B5	-0.0427 ± 0.00819
			B6	0.00193 ± 3.8498E-4
			B7	-5.11671E-5 ± 1.06941E-5
			B8	7.3326E-7 ± 1.6167E-7
			B9	-4.40187E-9 ± 1.02487E-9
			Sum of Squared Residuals (SSR)	767.301
			R-squared (Coefficient of Determination)	0.97747
			Adjusted R-squared	0.97415
Average temperature of movable jaw plate (fitted equatione)	the upper clamp	0-35min	Equation	y = Intercept + B1*x^1 + B2*x^2 + B3*x^3 + B4*x^4 + B5*x^5 + B6*x^6 + B7*x^7 + B8*x^8 + B9*x^9
			Plot	Average temperature of movable jaw plate (the upper clamp)
			Weight	unweighted
			Intercept	24.19881 ± 0.46994
			B1	-2.70149 ± 0.82883
			B2	-1.17721 ± 0.46761
			B3	0.31599 ± 0.11792
			B4	-0.04486 ± 0.01589
			B5	0.00386 ± 0.00125
			B6	-1.97357E-4 ± 5.85498E-5
			B7	5.82669E-6 ± 1.62641E-6
			B8	-9.16795E-8 ± 2.45875E-8
			B9	5.95203E-10 ± 1.55867E-10
			Sum of Squared Residuals (SSR)	17.7476
			R-squared (Coefficient of Determination)	0.99796
			Adjusted R-squared	0.99766
	the lower clamp	0-35min	Equation	y = Intercept + B1*x^1 + B2*x^2 + B3*x^3 + B4*x^4 + B5*x^5 + B6*x^6 + B7*x^7 + B8*x^8 + B9*x^9
			Plot	Average temperature of movable jaw plate (the lower clamp)
			Weight	unweighted
			Intercept	25.59396 ± 0.70542
			B1	-8.53182 ± 1.24415
			B2	3.10865 ± 0.70193
			B3	-0.83537 ± 0.177
			B4	0.1077 ± 0.02385
			B5	-0.00747 ± 0.00187
			B6	2.9816E-4 ± 8.78885E-5
			B7	-6.87302E-6 ± 2.44139E-6
			B8	8.48712E-8 ± 3.69081E-8
			B9	-4.33526E-10 ± 2.33971E-10
			Sum of Squared Residuals (SSR)	39.9901
			R-squared (Coefficient of Determination)	0.99568
			Adjusted R-squared	0.99505
Average temperature of the clamp jaws (fitted equatione)	the upper clamp	0-35min	Equation	y = Intercept + B1*x^1 + B2*x^2 + B3*x^3 + B4*x^4 + B5*x^5 + B6*x^6 + B7*x^7 + B8*x^8 + B9*x^9
			Plot	Average temperature of the clamp jaws (the upper clamp)
			Weight	unweighted
			Intercept	27.03222 ± 1.20985
			B1	-8.47457 ± 2.1338
			B2	1.06587 ± 1.20386
			B3	-0.31092 ± 0.30357
			B4	0.04043 ± 0.0409
			B5	-0.00238 ± 0.00321
			B6	6.58169E-5 ± 1.50735E-4
			B7	-6.30321E-7 ± 4.18715E-6
			B8	-5.89801E-9 ± 6.33E-8
			B9	1.17177E-10 ± 4.01276E-10
			Sum of Squared Residuals (SSR)	117.63
			R-squared (Coefficient of Determination)	0.994
			Adjusted R-squared	0.99312
	the lower clamp	0-35min	Equation	y = Intercept + B1*x^1 + B2*x^2 + B3*x^3 + B4*x^4 + B5*x^5 + B6*x^6 + B7*x^7 + B8*x^8 + B9*x^9
			Plot	Average temperature of the clamp jaws (the lower clamp)
			Weight	unweighted
			Intercept	24.6982 ± 1.16404
			B1	-14.3635 ± 2.053
			B2	5.45709 ± 1.15827
			B3	-1.4909 ± 0.29207
			B4	0.20034 ± 0.03935
			B5	-0.01466 ± 0.00308
			B6	6.25127E-4 ± 1.45027E-4
			B7	-1.55812E-5 ± 4.0286E-6
			B8	2.11054E-7 ± 6.0903E-8
			B9	-1.20215E-9 ± 3.86081E-10
			Sum of Squared Residuals (SSR)	108.89
			R-squared (Coefficient of Determination)	0.99376
			Adjusted R-squared	0.99284
Average temperature of the tendon at 1cm proximity to the clamp jaws (fitted equatione)	the upper clamp	0-10min	Equation	y = Intercept + B1*x^1 + B2*x^2 + B3*x^3 + B4*x^4 + B5*x^5 + B6*x^6 + B7*x^7 + B8*x^8 + B9*x^9	10-35min	Equation	y = Intercept + B1*x^1 + B2*x^2 + B3*x^3 + B4*x^4 + B5*x^5 + B6*x^6 + B7*x^7 + B8*x^8 + B9*x^9
			Plot	Average temperature of the tendon at 1cm proximity to the clamp jaws (the upper clamp)		Plot	Average temperature of the tendon at 1cm proximity to the clamp jaws (the upper clamp)
			Weight	unweighted		Weight	unweighted
			Intercept	26.43085 ± 1.91564		Intercept	-1199.91702 ± 640.8235
			B1	-2.02889 ± 15.09901		B1	482.44594 ± 303.22079
			B2	-21.93358 ± 34.00331		B2	-85.0282 ± 62.27486
			B3	25.30235 ± 31.61401		B3	8.63979 ± 7.28969
			B4	-14.21593 ± 15.28684		B4	-0.55789 ± 0.53634
			B5	4.54979 ± 4.24974		B5	0.02379 ± 0.02574
			B6	-0.85219 ± 0.70454		B6	-6.70899E-4 ± 8.06704E-4
			B7	0.09177 ± 0.06877		B7	1.20957E-5 ± 1.59325E-5
			B8	-0.00525 ± 0.00364		B8	-1.26661E-7 ± 1.8013E-7
			B9	1.23089E-4 ± 8.08841E-5		B9	5.87395E-10 ± 8.89105E-10
			Sum of Squared Residuals (SSR)	40.6163		Sum of Squared Residuals (SSR)	0.68472
			R-squared (Coefficient of Determination)	0.96501		R-squared (Coefficient of Determination)	0.99934
			Adjusted R-squared	0.93639		Adjusted R-squared	0.99919
	the lower clamp	0-10min	Equation	y = Intercept + B1*x^1 + B2*x^2 + B3*x^3 + B4*x^4 + B5*x^5 + B6*x^6 + B7*x^7 + B8*x^8 + B9*x^9	10-35min	Equation	y = Intercept + B1*x^1 + B2*x^2 + B3*x^3 + B4*x^4 + B5*x^5 + B6*x^6 + B7*x^7 + B8*x^8 + B9*x^9
			Plot	Average temperature of the tendon at 1cm proximity to the clamp jaws (the lower clamp)		Plot	Average temperature of the tendon at 1cm proximity to the clamp jaws (the lower clamp)
			Weight	unweighted		Weight	unweighted
			Intercept	26.32069 ± 2.1633		Intercept	-1903.60823 ± 758.29961
			B1	-17.50509 ± 17.05105		B1	815.29347 ± 358.80739
			B2	18.77545 ± 38.39935		B2	-150.69979 ± 73.69112
			B3	-14.57744 ± 35.70116		B3	15.79896 ± 8.62604
			B4	5.28992 ± 17.26317		B4	-1.03557 ± 0.63466
			B5	-0.76774 ± 4.79916		B5	0.04405 ± 0.03046
			B6	-0.0097 ± 0.79563		B6	-0.00122 ± 9.54589E-4
			B7	0.01491 ± 0.07766		B7	2.11037E-5 ± 1.88533E-5
			B8	-0.00151 ± 0.00412		B8	-2.08343E-7 ± 2.13152E-7
			B9	4.86261E-5 ± 9.1341E-5		B9	8.93447E-10 ± 1.0521E-9
			Sum of Squared Residuals (SSR)	51.7971		Sum of Squared Residuals (SSR)	0.95878
			R-squared (Coefficient of Determination)	0.94941		R-squared (Coefficient of Determination)	0.99881
			Adjusted R-squared	0.90802		Adjusted R-squared	0.99855
Average temperature of the tendon at 2cm proximity to the clamp jaws (fitted equatione)	the upper clamp	0-3.5min	Equation	y = Intercept + B1*x^1 + B2*x^2 + B3*x^3 + B4*x^4 + B5*x^5 + B6*x^6 + B7*x^7	3.5-8.5min	Equation	y = Intercept + B1*x^1 + B2*x^2 + B3*x^3 + B4*x^4 + B5*x^5 + B6*x^6 + B7*x^7				8.5-12min	Equation	y = Intercept + B1*x^1 + B2*x^2 + B3*x^3 + B4*x^4 + B5*x^5 + B6*x^6	12-35min	Equation	y = Intercept + B1*x^1 + B2*x^2 + B3*x^3 + B4*x^4 + B5*x^5 + B6*x^6 + B7*x^7 + B8*x^8 + B9*x^9
			Plot	Average temperature of the tendon at 2cm proximity to the clamp jaws (the upper clamp)		Plot	Average temperature of the tendon at 2cm proximity to the clamp jaws (the upper clamp)					Plot	Average temperature of the tendon at 2cm proximity to the clamp jaws (the upper clamp)		Plot	Average temperature of the tendon at 2cm proximity to the clamp jaws (the upper clamp)
			Weight	unweighted		Weight	unweighted					Weight	unweighted		Weight	unweighted
			Intercept	26.3 ± --		Intercept	-21763.57937 ± 4697.10165					Intercept	168158.91513 ± 95126.19733		Intercept	-836.63984 ± 1238.75844
			B1	-48.55095 ± --		B1	29644.37218 ± 6182.38693					B1	-103749.99754 ± 58194.53165		B1	352.45937 ± 537.65943
			B2	195.89222 ± --		B2	-17025.52382 ± 3439.08327					B2	26504.96582 ± 14775.07087		B2	-63.5115 ± 101.95643
			B3	-310.30889 ± --		B3	5345.50999 ± 1048.39715					B3	-3588.85454 ± 1992.80027		B3	6.5422 ± 11.08959
			B4	232.22222 ± --		B4	-990.51484 ± 189.22776					B4	271.6841 ± 150.59933		B4	-0.42466 ± 0.76271
			B5	-88.83556 ± --		B5	108.31519 ± 20.22989					B5	-10.90462 ± 6.04645		B5	0.01804 ± 0.03441
			B6	16.83556 ± --		B6	-6.47373 ± 1.18663					B6	0.18133 ± 0.10076		B6	-5.02761E-4 ± 0.00102
			B7	-1.2546 ± --		B7	0.16321 ± 0.02947					Sum of Squared Residuals (SSR)	0.29206		B7	8.87917E-6 ± 1.91129E-5
			Sum of Squared Residuals (SSR)	0		Sum of Squared Residuals (SSR)	0.10674					R-squared (Coefficient of Determination)	0.9724		B8	-9.03844E-8 ± 2.0609E-7
			R-squared (Coefficient of Determination)	1		R-squared (Coefficient of Determination)	0.99709					Adjusted R-squared	0.88958		B9	4.04946E-10 ± 9.74058E-10
			Adjusted R-squared	--		Adjusted R-squared	0.98688								Sum of Squared Residuals (SSR)	0.15402
															R-squared (Coefficient of Determination)	0.99803
															Adjusted R-squared	0.99755
	the lower clamp	0-6min	Equation	y = Intercept + B1*x^1 + B2*x^2 + B3*x^3 + B4*x^4 + B5*x^5 + B6*x^6 + B7*x^7	6-7.5min	Equation	y = Intercept + B1*x^1 + B2*x^2 + B3*x^3 + B4*x^4 + B5*x^5 + B6*x^6 + B7*x^7					7.5-35min	Equation	y = Intercept + B1*x^1 + B2*x^2 + B3*x^3 + B4*x^4 + B5*x^5 + B6*x^6 + B7*x^7 + B8*x^8 + B9*x^9
			Plot	Average temperature of the tendon at 2cm proximity to the clamp jaws (the lower clamp)		Plot	Average temperature of the tendon at 2cm proximity to the clamp jaws (the lower clamp)						Plot	Average temperature of the tendon at 2cm proximity to the clamp jaws (the lower clamp)
			Weight	unweighted		Weight	unweighted						Weight	unweighted
			Intercept	26.40404 ± 0.7636		Intercept	1578706.89924 ± --						Intercept	-935.63043 ± 296.20701
			B1	-6.65502 ± 6.59217		B1	-1457494.97728 ± --						B1	420.81712 ± 143.58061
			B2	0.09032 ± 15.56898		B2	573918.06297 ± --						B2	-81.61597 ± 30.14621
			B3	3.63148 ± 14.56115		B3	-124955.00769 ± --						B3	9.08915 ± 3.60044
			B4	-2.94627 ± 6.68006		B4	16246.99999 ± --						B4	-0.6391 ± 0.26978
			B5	0.99543 ± 1.60124		B5	-1261.67111 ± --						B5	0.0294 ± 0.01316
			B6	-0.15097 ± 0.1924		B6	54.18667 ± --						B6	-8.85118E-4 ± 4.18758E-4
			B7	0.00844 ± 0.00914		B7	-0.99302 ± --						B7	1.68141E-5 ± 8.3834E-6
			Sum of Squared Residuals (SSR)	2.9269		Sum of Squared Residuals (SSR)	0						B8	-1.83008E-7 ± 9.59525E-8
			R-squared (Coefficient of Determination)	0.97391		R-squared (Coefficient of Determination)	1						B9	8.70208E-10 ± 4.78918E-10
			Adjusted R-squared	0.93739		Adjusted R-squared	--						Sum of Squared Residuals (SSR)	0.29558
													R-squared (Coefficient of Determination)	0.99788
													Adjusted R-squared	0.99742

[truncated: 1 more sheets: combined comparison]
